# Supplementary material for: Proteome Analysis of the UVB-Resistant Marine Bacterium Photobacterium angustum S14
Source: PubMed Central journal article supplement (PMC3411663; doi:10.1371/journal.pone.0042299), 2012-08-01

REPLICATE 1

VAS14\_00681 (score 98)

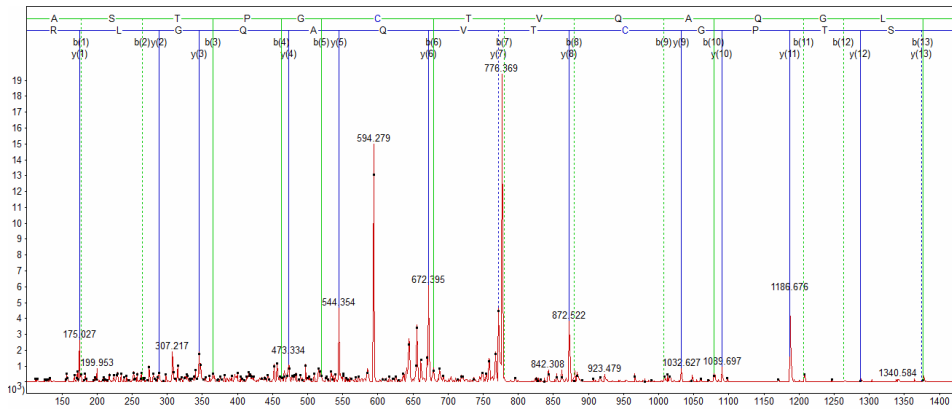

VAS14\_18354 (score 97)

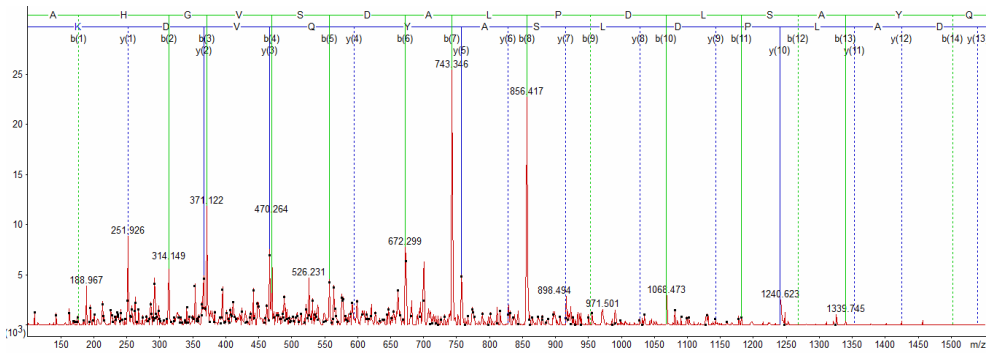

VAS14\_17676 (score 91)

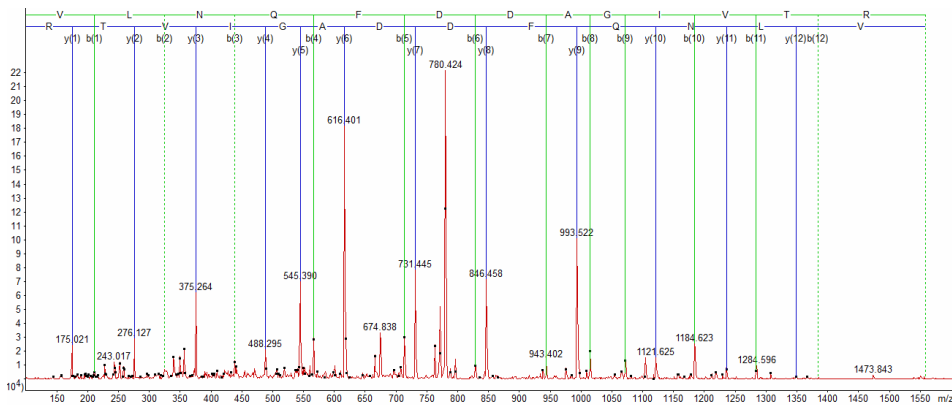

VAS14\_01671 (score 73)

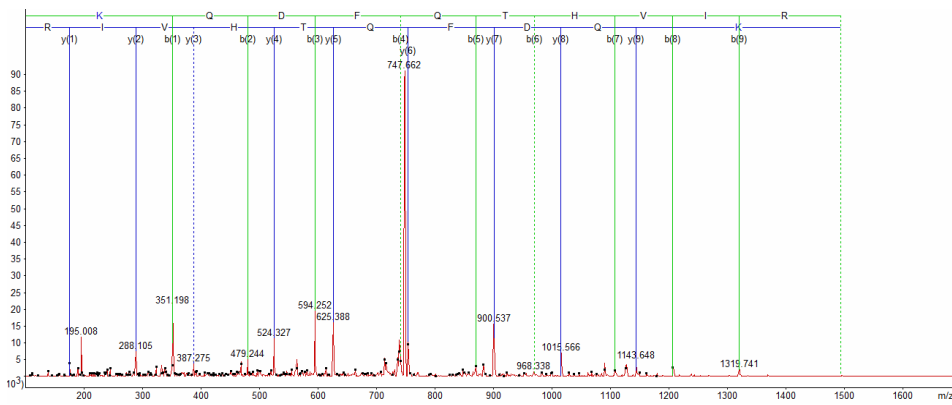

VAS14\_16741 (score 72)

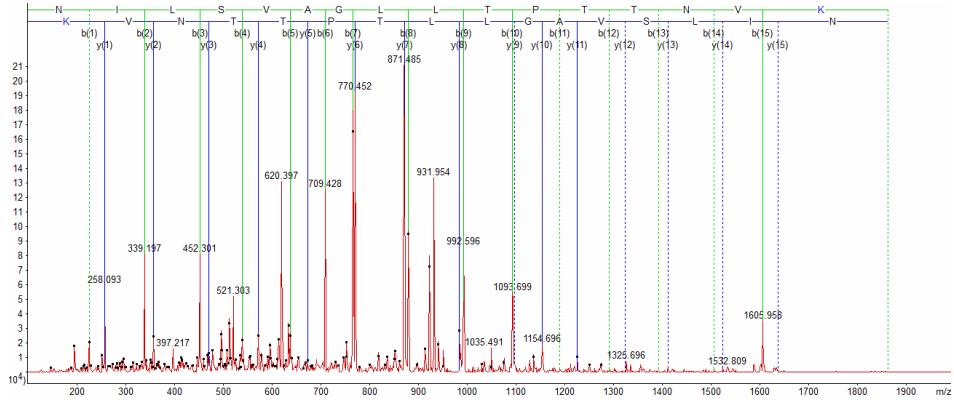

VAS14\_16496 (score 70)

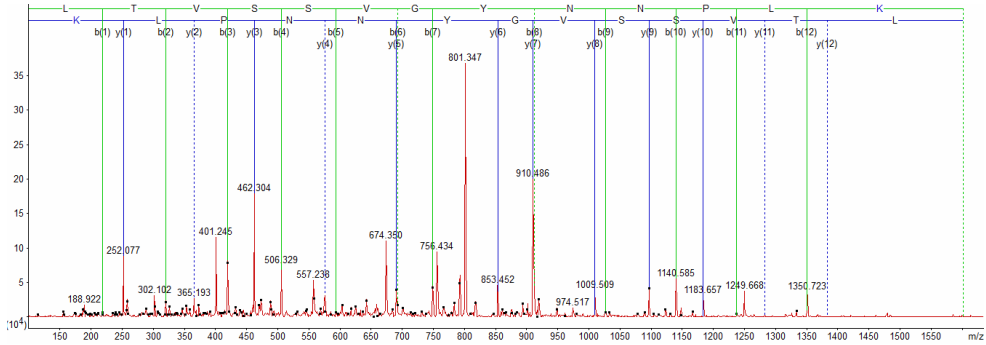

VAS14\_08455 (score 66)

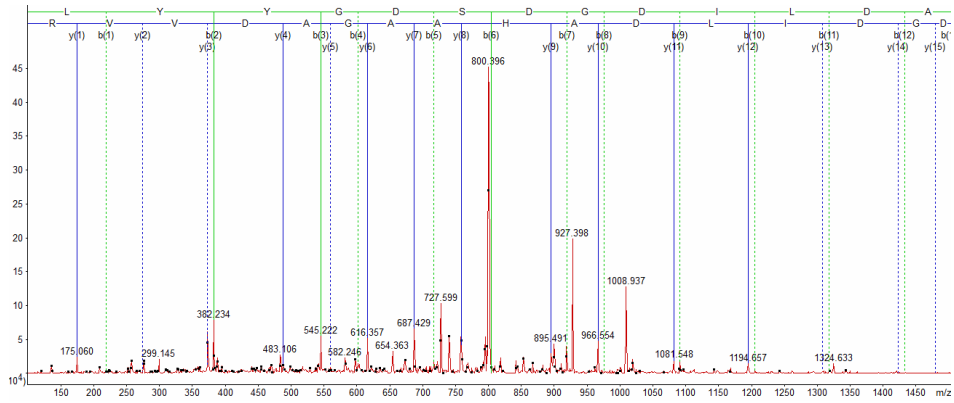

VAS14\_07819 (score 64)

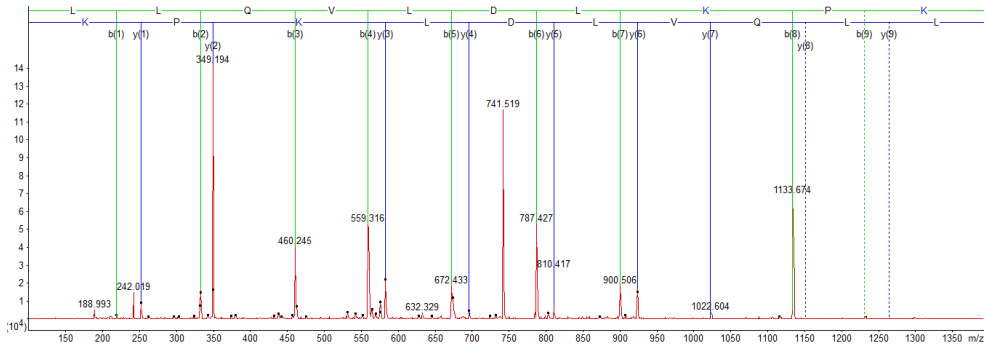

VAS14\_19851 (score 59)

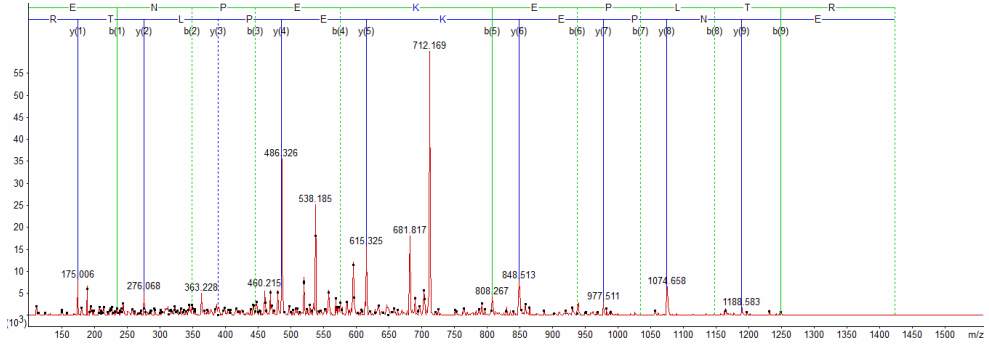

VAS14\_06678 (score 58)

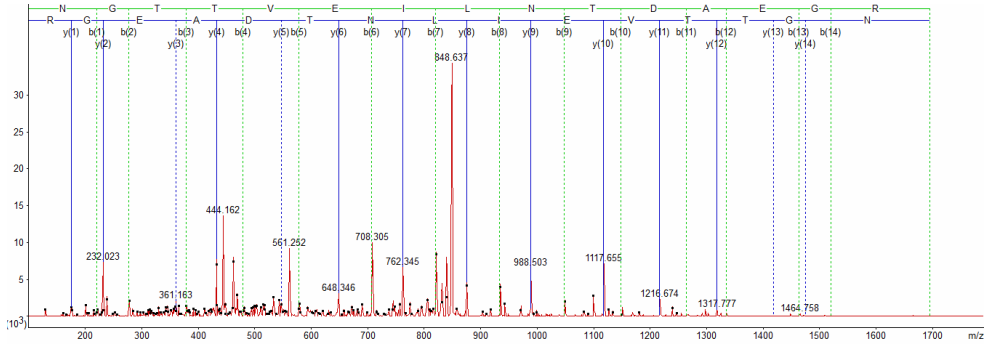

VAS14\_18729 (score 53)

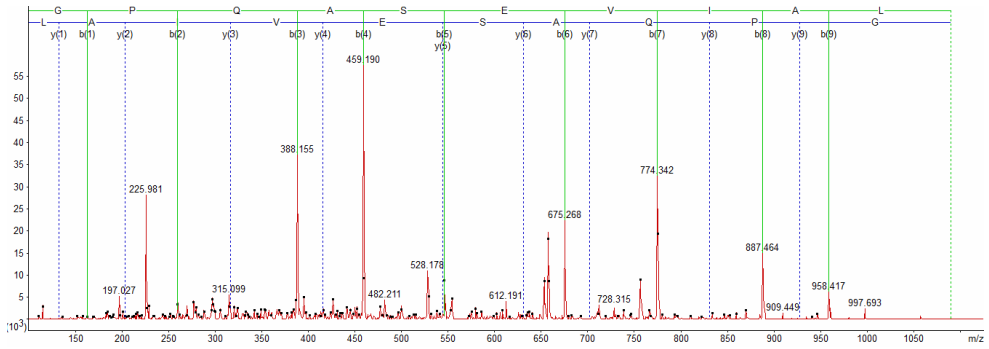

VAS14\_21837 (score 52)

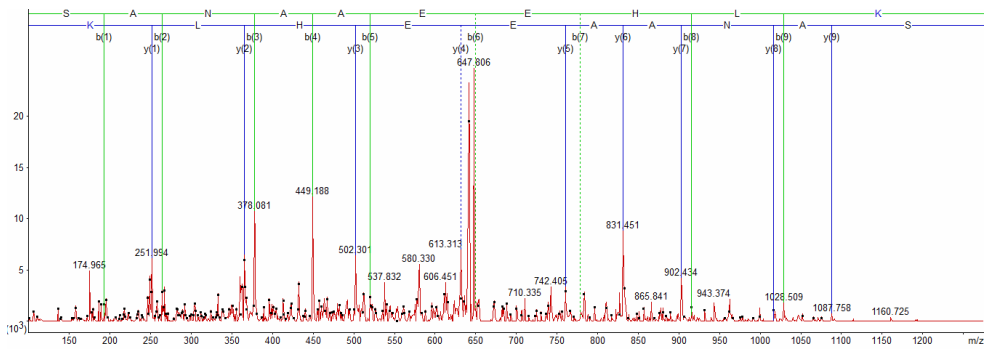

VAS14\_07509 (score 52)

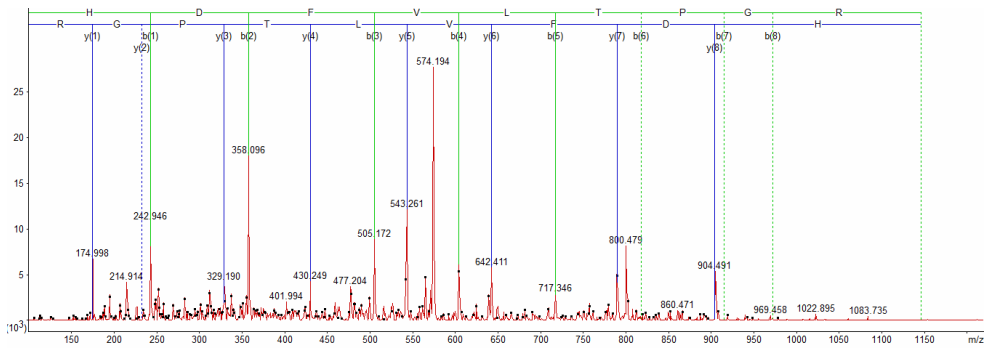

VAS14\_17636 (score 52)

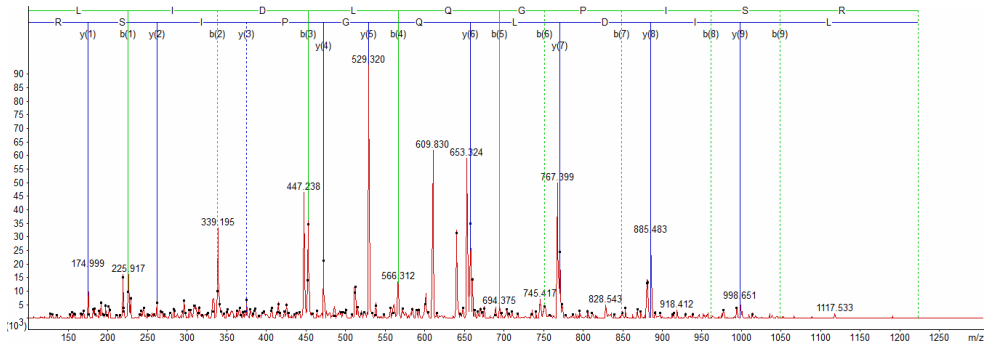

VAS14\_05243 (score 51)

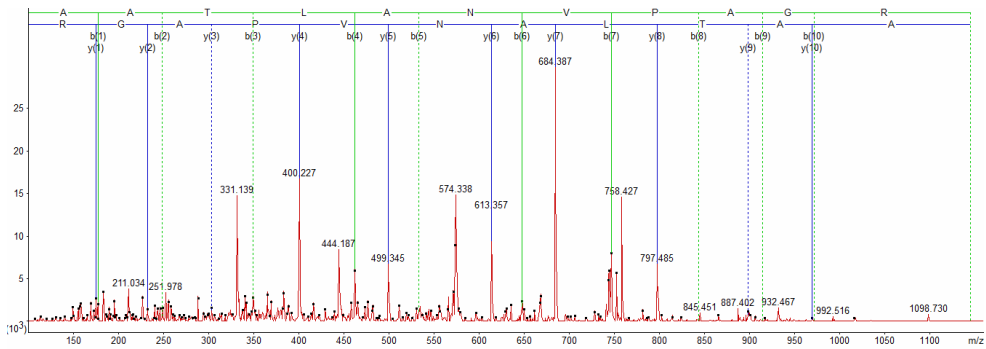

VAS14\_07319 (score 40)

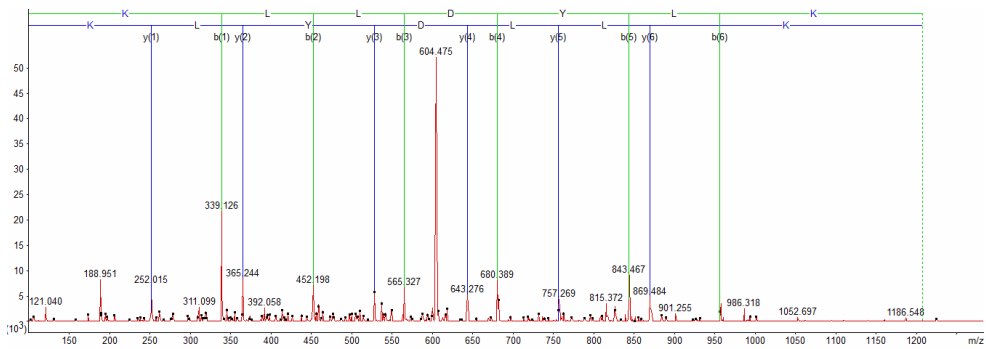

REPLICATE 2

VAS14\_20261 (score 76)

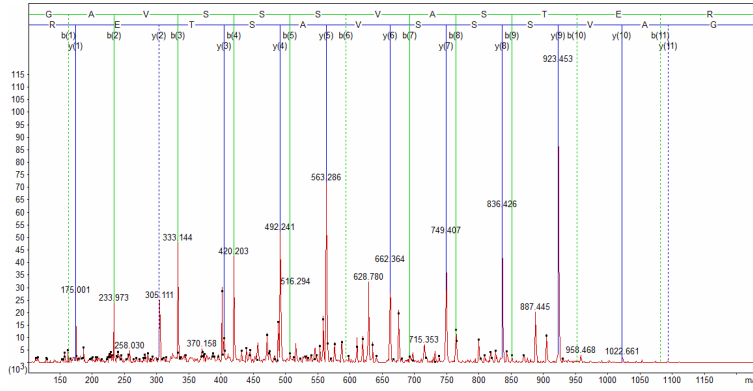

VAS14\_18359 (score 76)

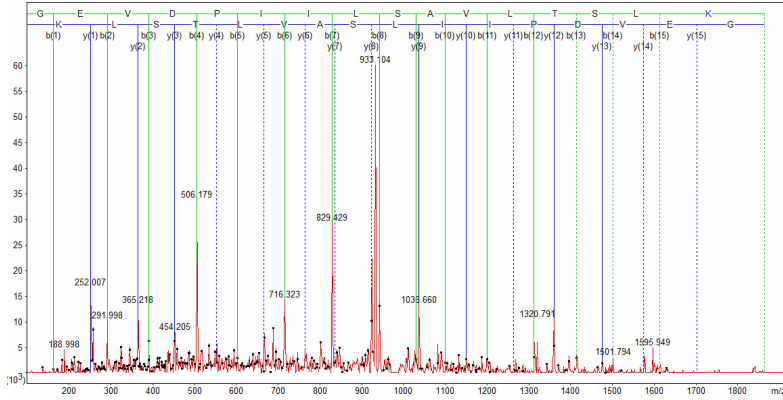

VAS14\_07945 (score 74)

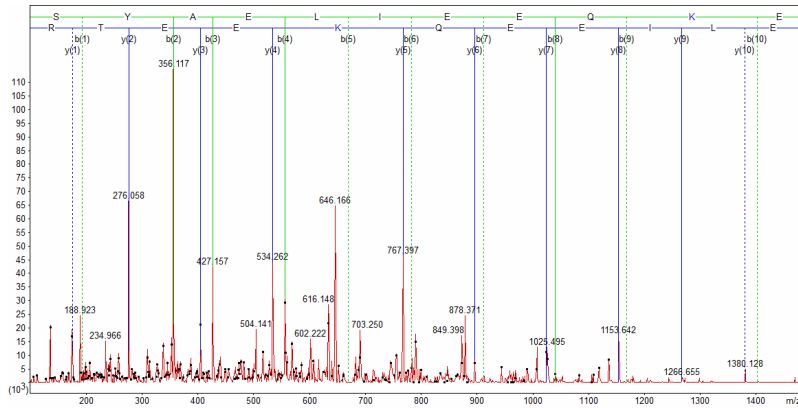

VAS14\_17236 (score 74)

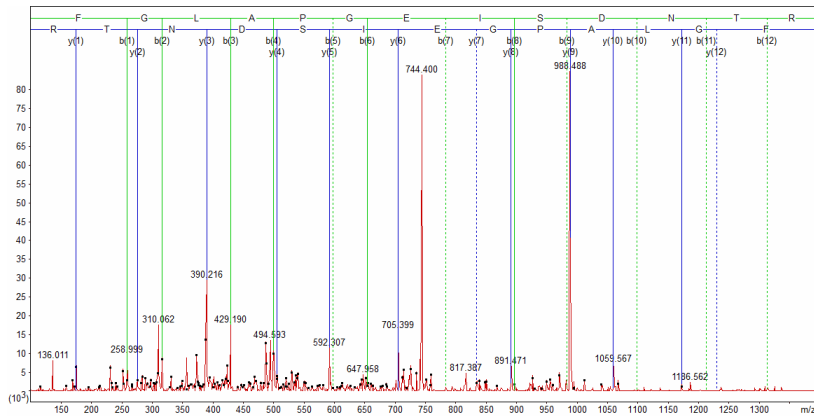

VAS14\_12249 (score 73)

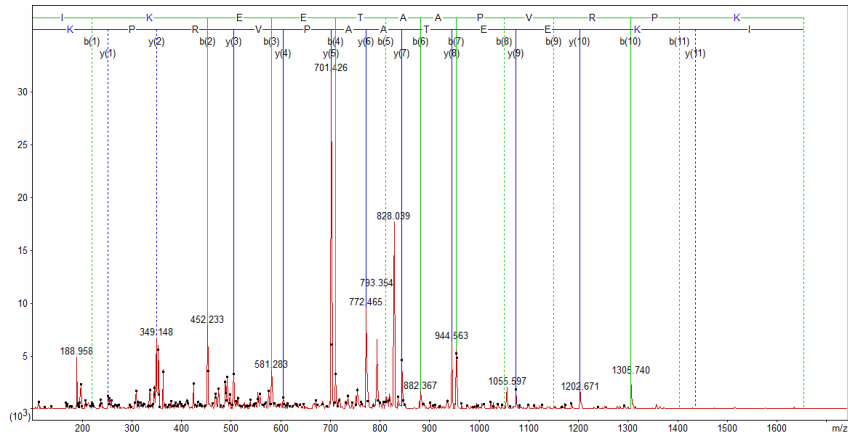

VAS14\_11649 (score 73)

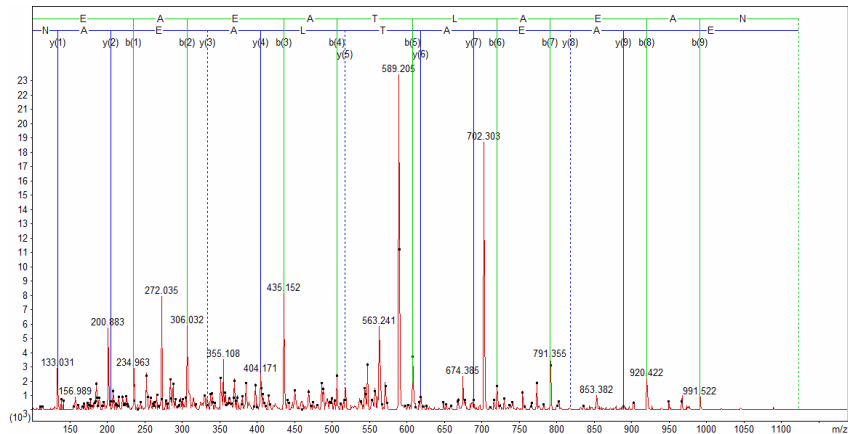

VAS14\_07424 (score 70)

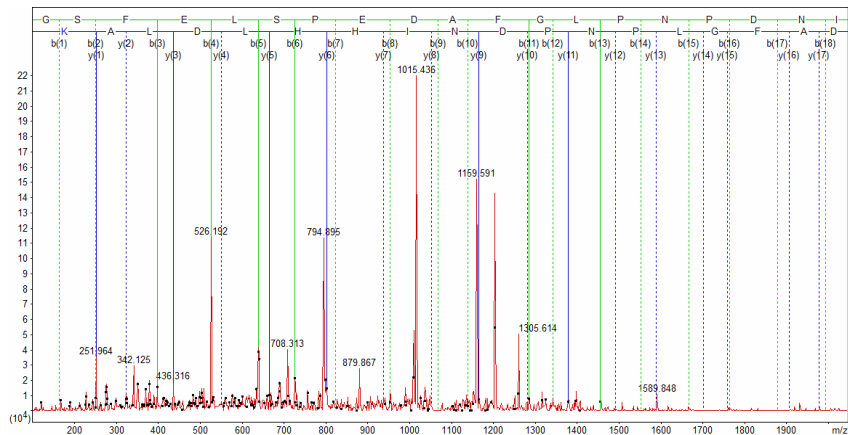

VAS14\_07719 (score 68)

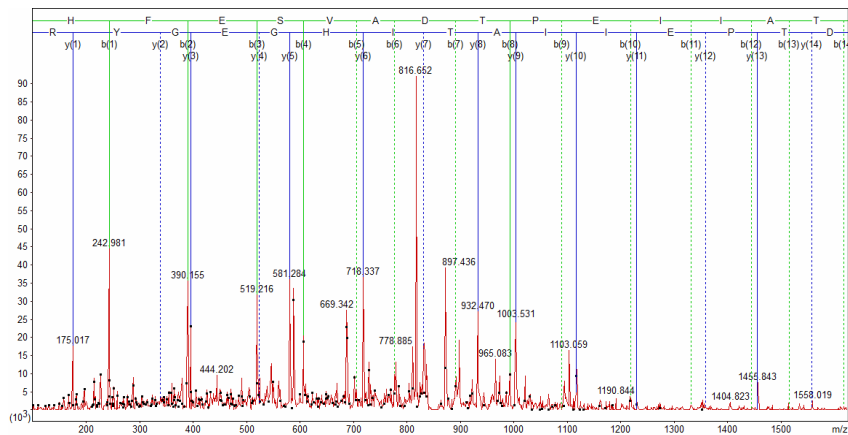

VAS14\_00546 (score 68)

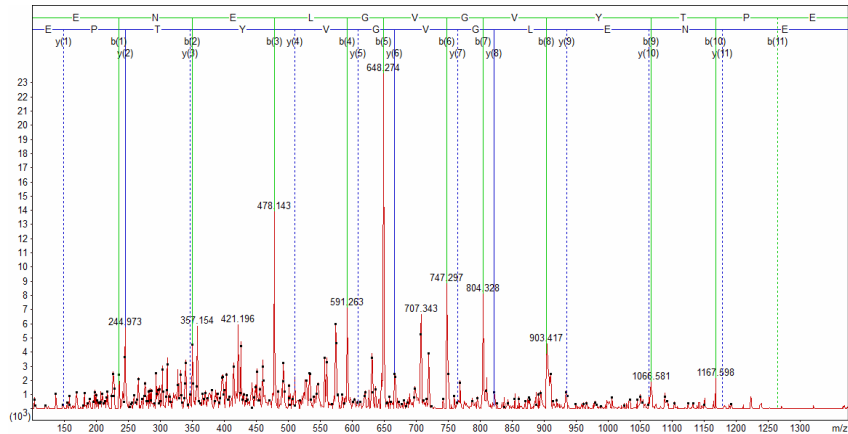

VAS14\_06113 (score 67)

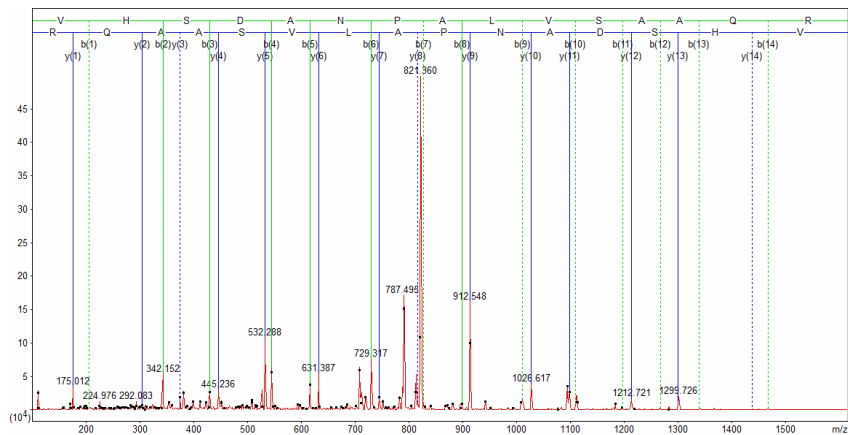

VAS14\_21772 (score 66)

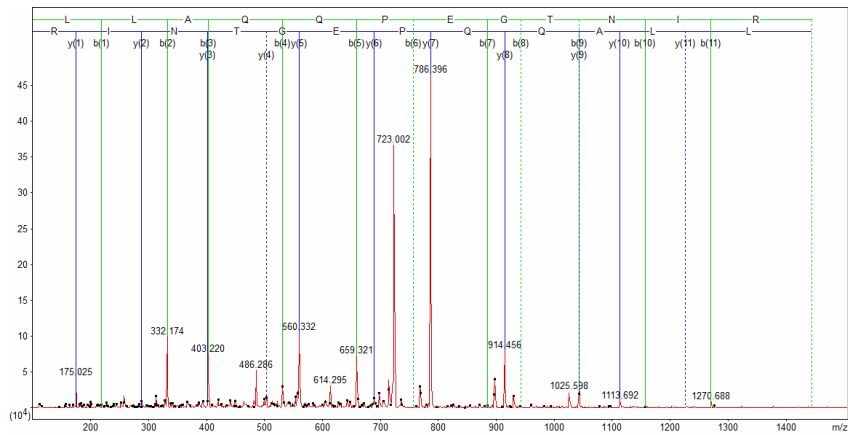

VAS14\_04213 (score 65)

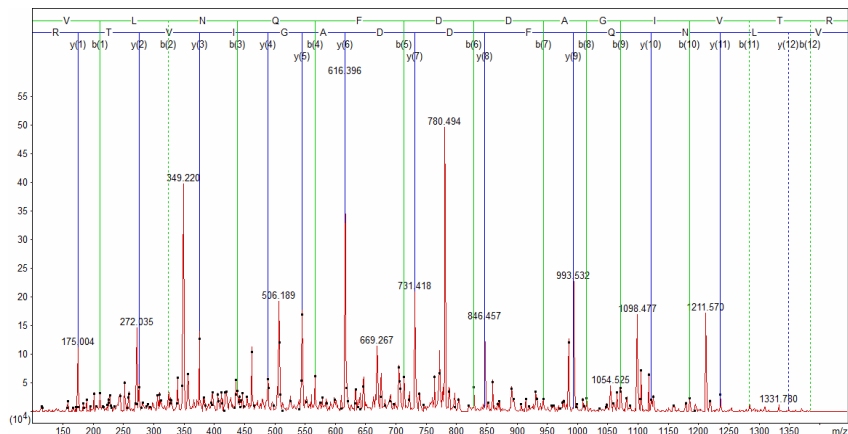

VAS14\_18669 (score 64)

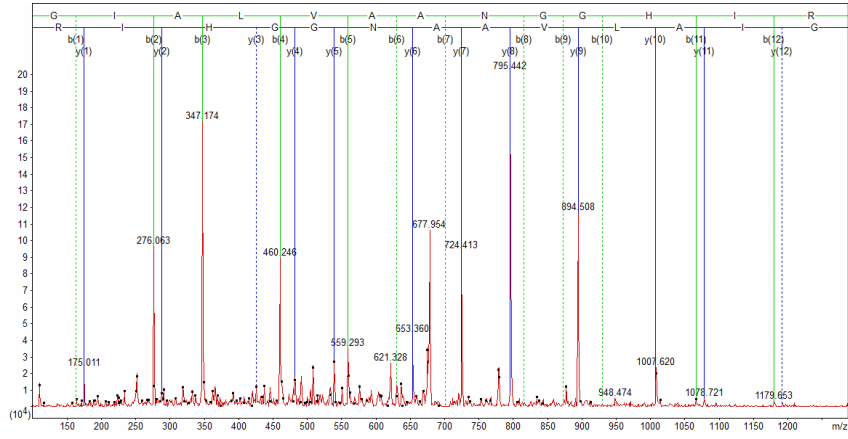

VAS14\_03748 (score 63)

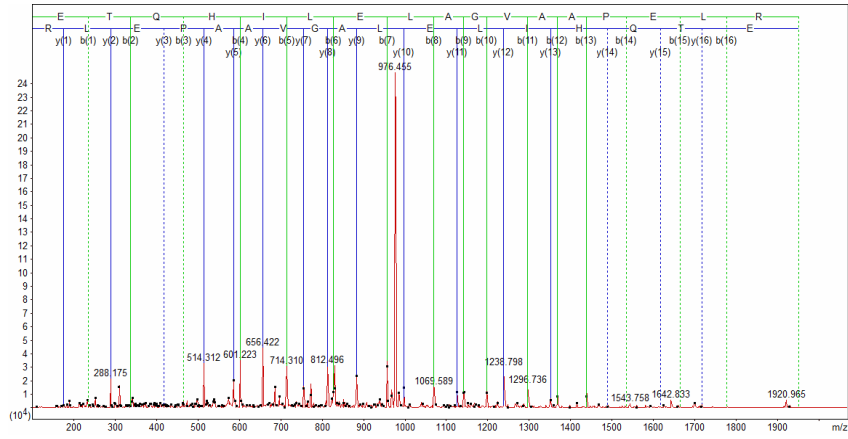

VAS14\_19101 (score 62)

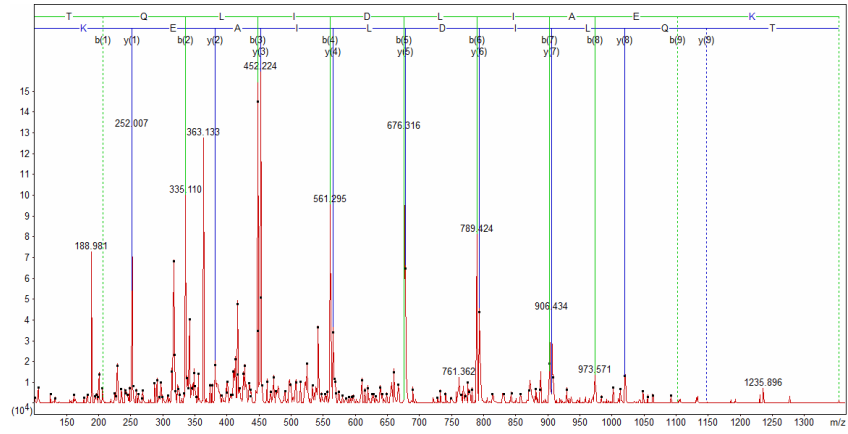

VAS14\_02738 (score 61)

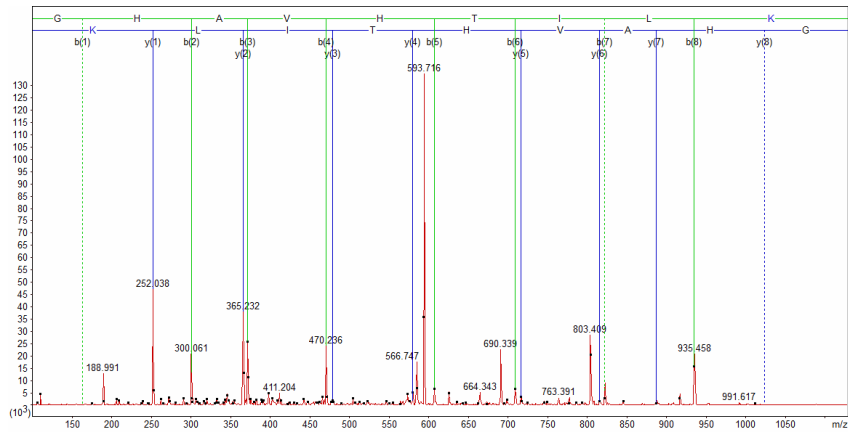



**VAS14\_10579 (score 60)**

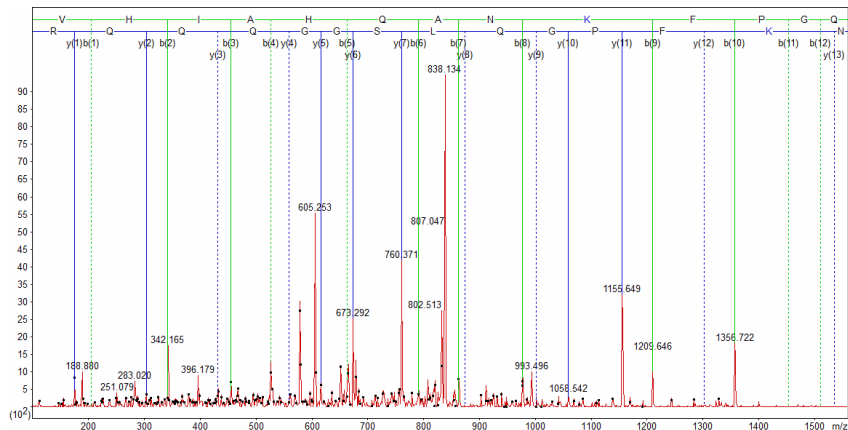

**VAS14\_18354 (score 56)**

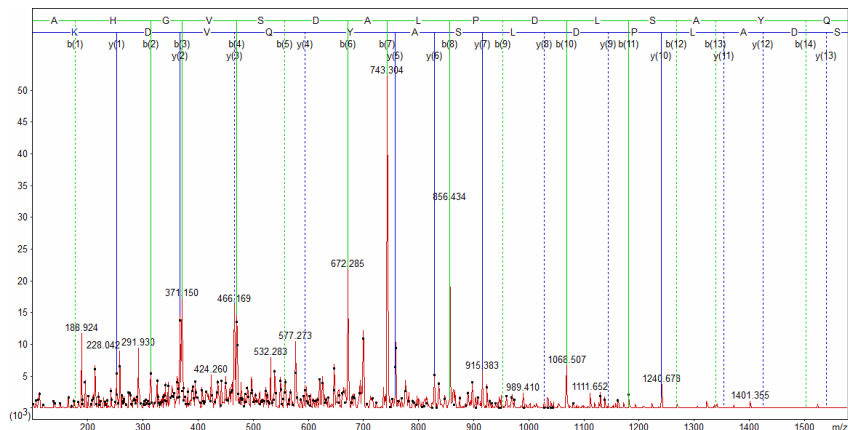

**VAS14\_01231 (score 56)**

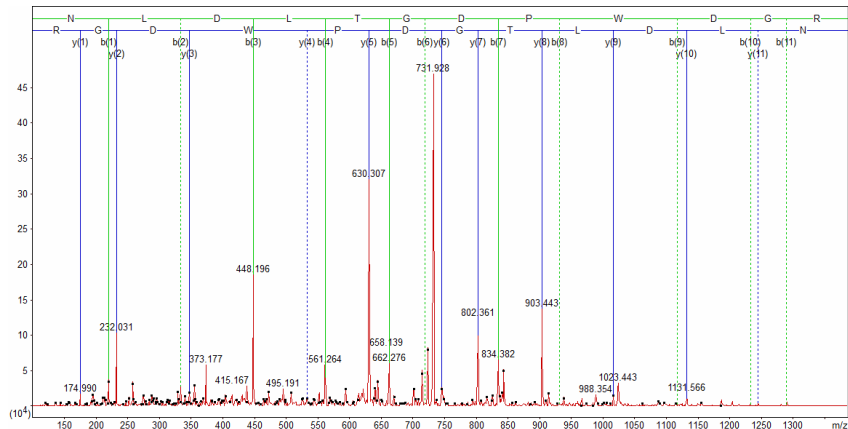

**VAS14\_13819 (score 55)**

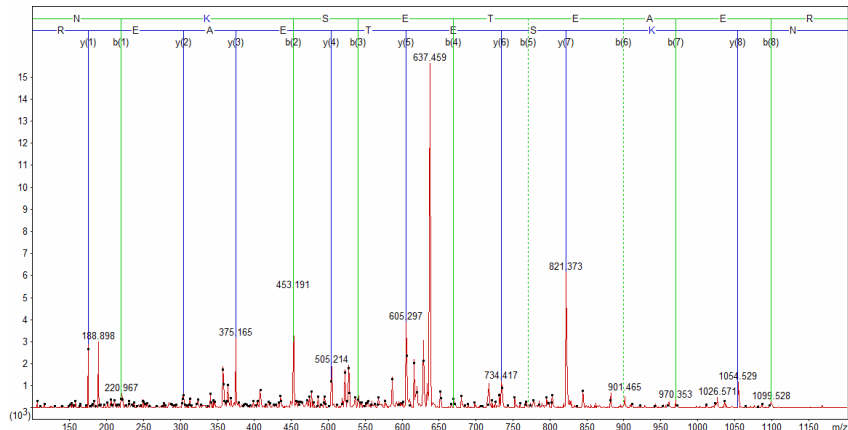

**VAS14\_18399 (score 55)**

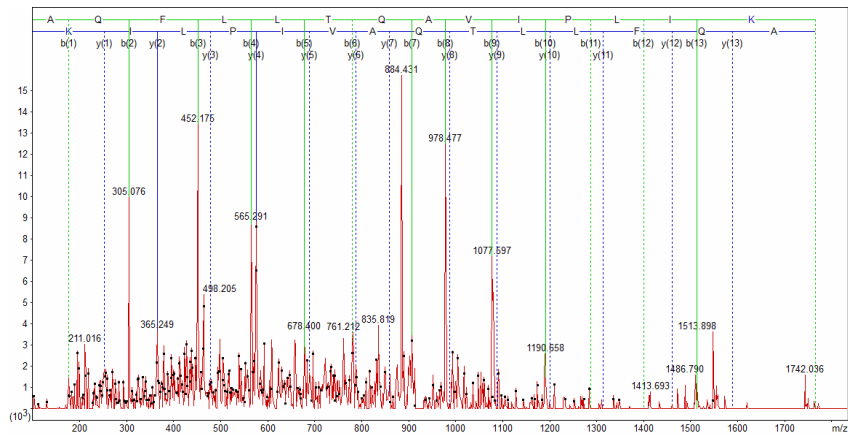

**VAS14\_19761 (score 54)**

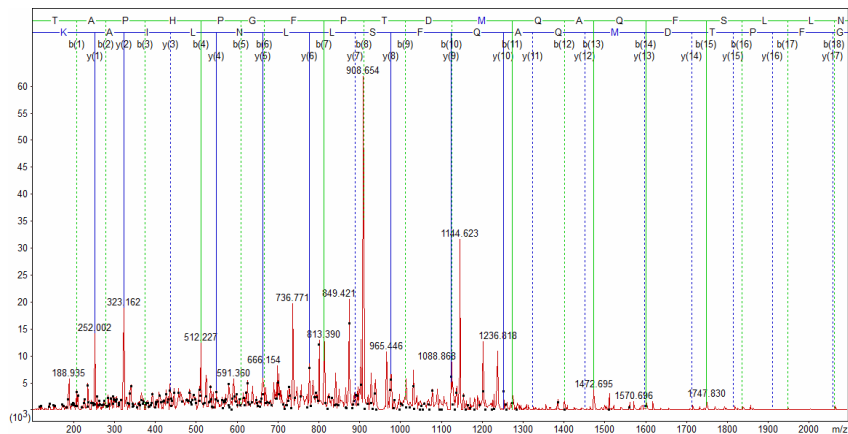

**VAS14\_19581 (score 54)**

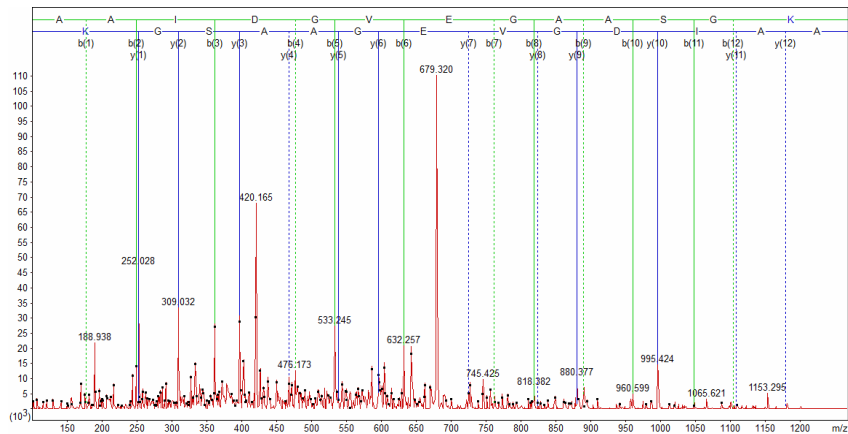

**VAS14\_07344 (score 54)**

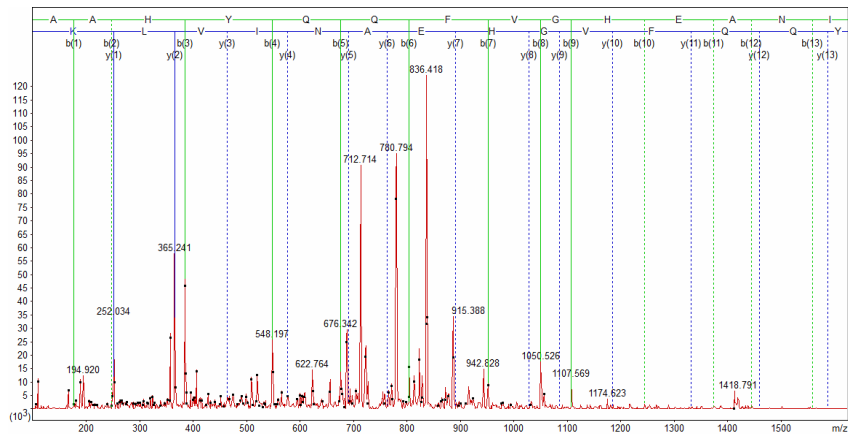

**VAS14\_12919 (score 52)**

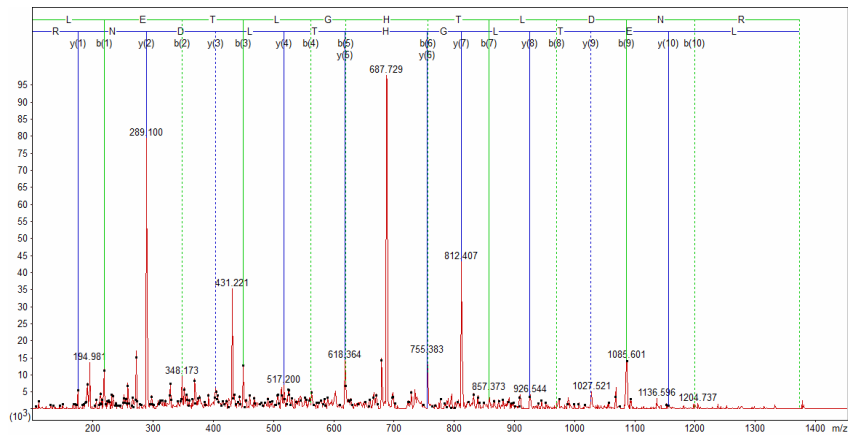

**VAS14\_19666 (score 52)**

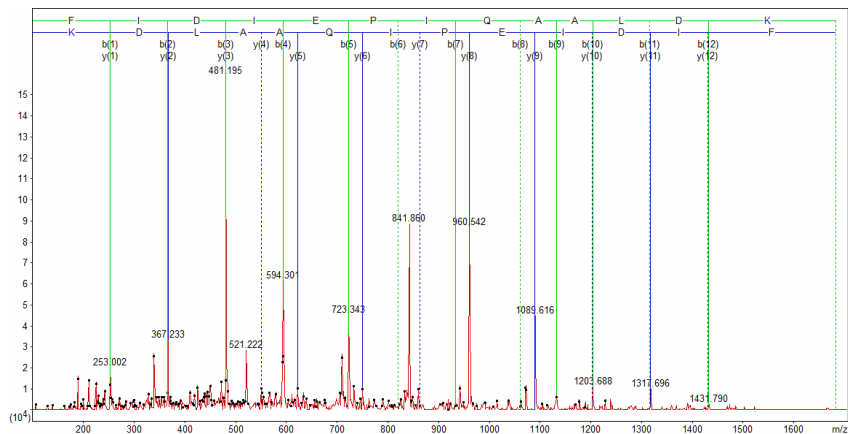

**VAS14\_20371 (score 50)**

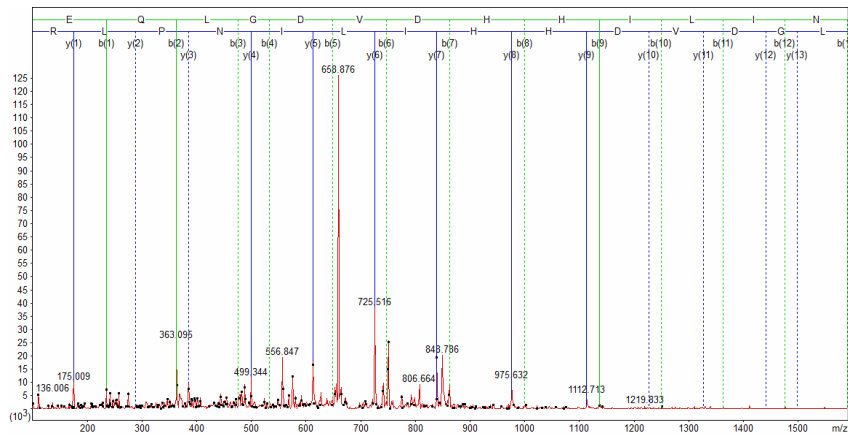

**VAS14\_17911 (score 47)**

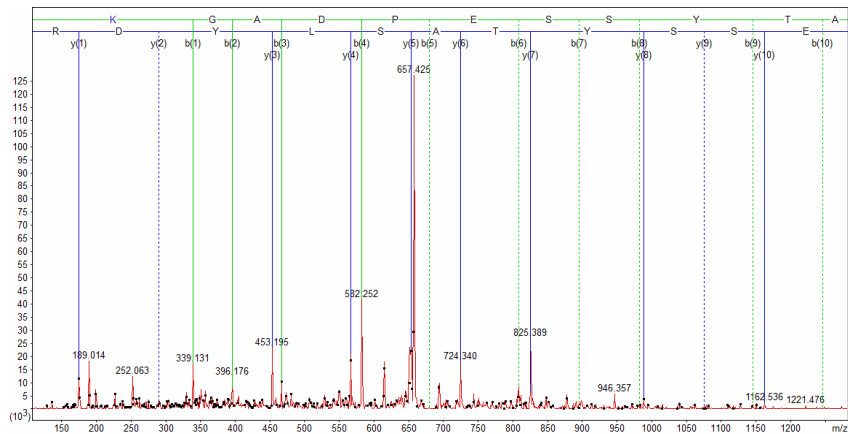

VAS14\_01731 (score 47)

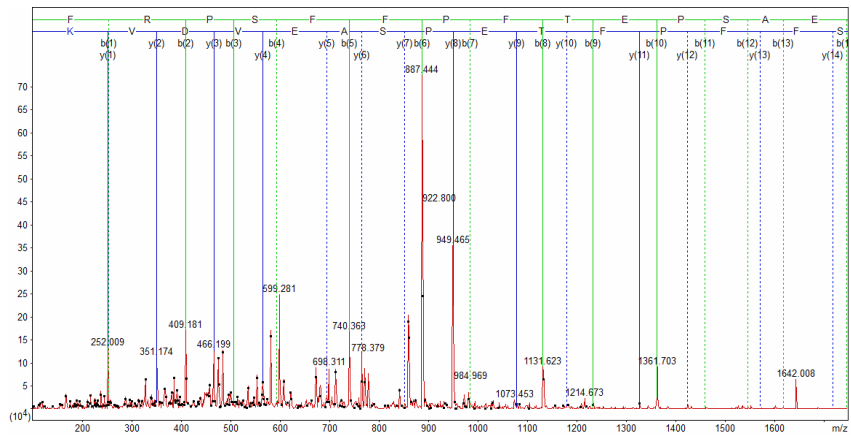

VAS14\_16601 (score 46)

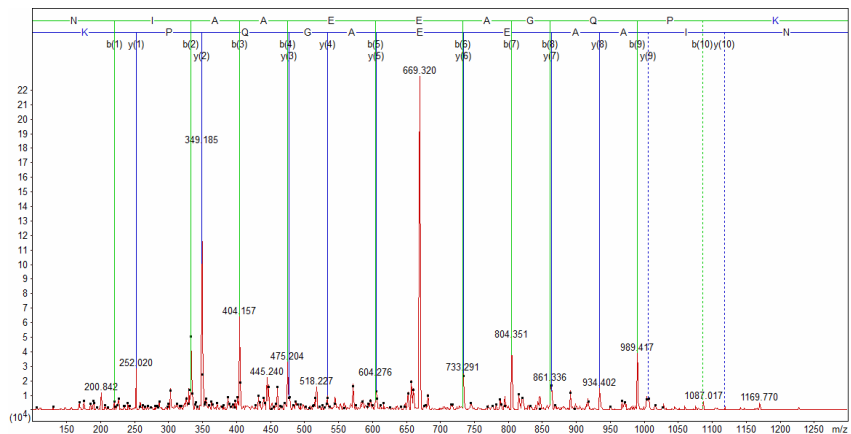

VAS14\_21572 (score 44)

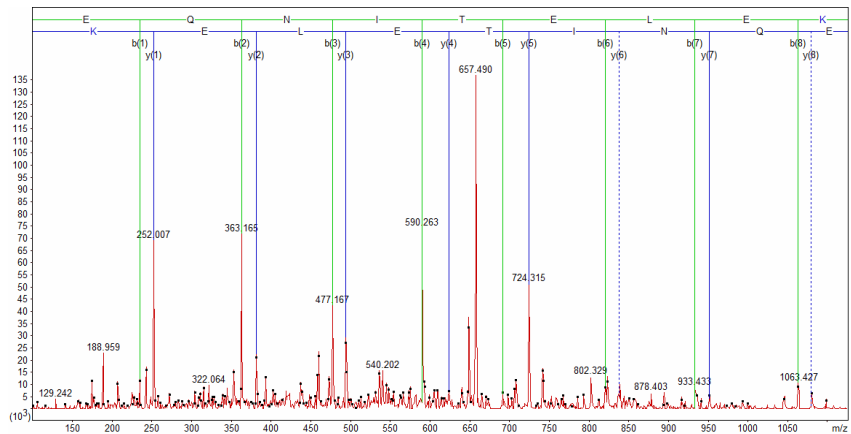

VAS14\_00976 (score 42)

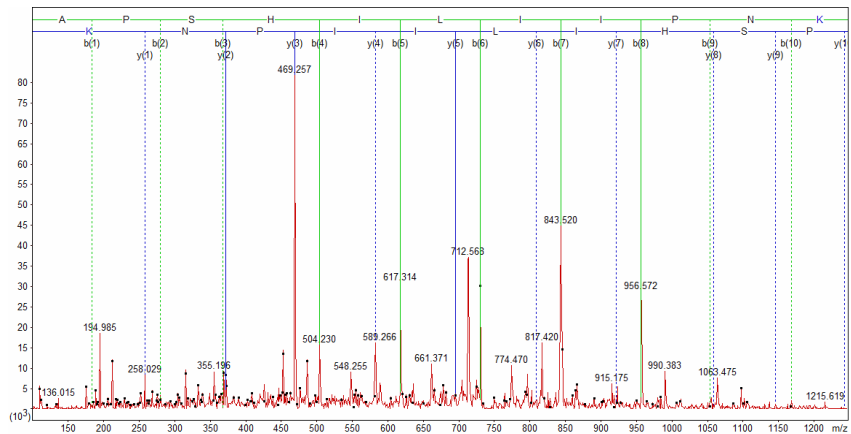

**VAS14\_16439 (score 42)**

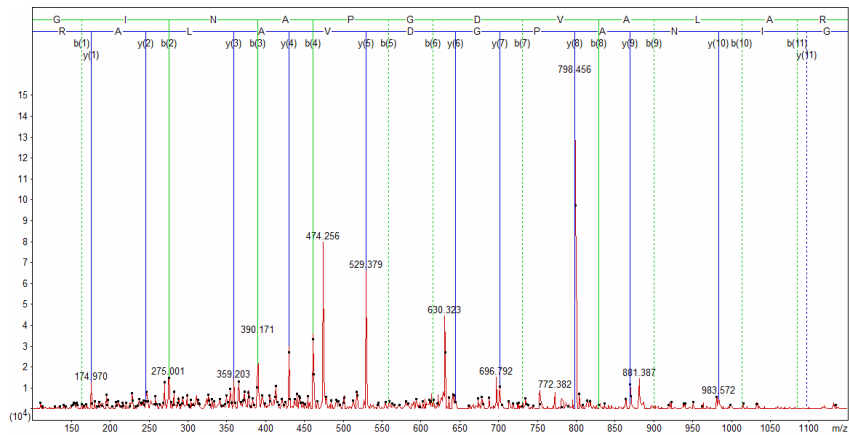

**VAS14\_00443 (score 41)**

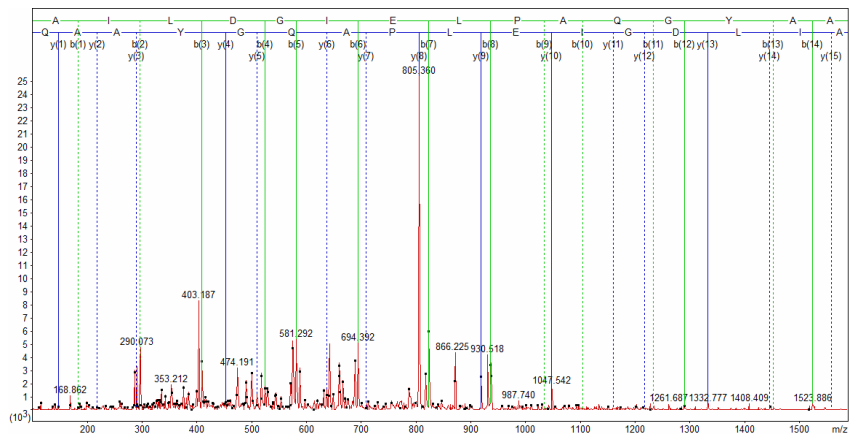

**VAS14\_21302 (score 41)**

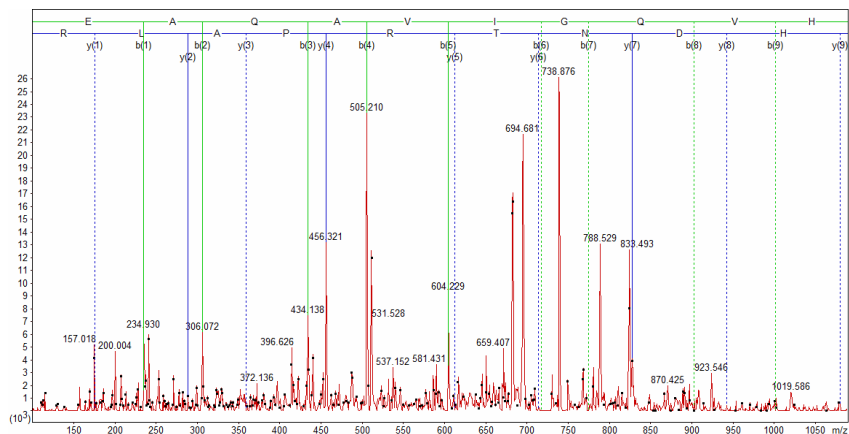

**VAS14\_21282 (score 40)**

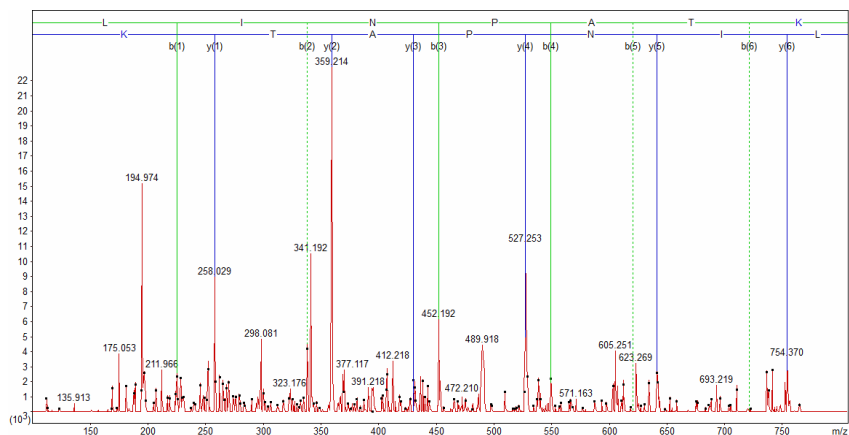

VAS14\_19141 (score38)

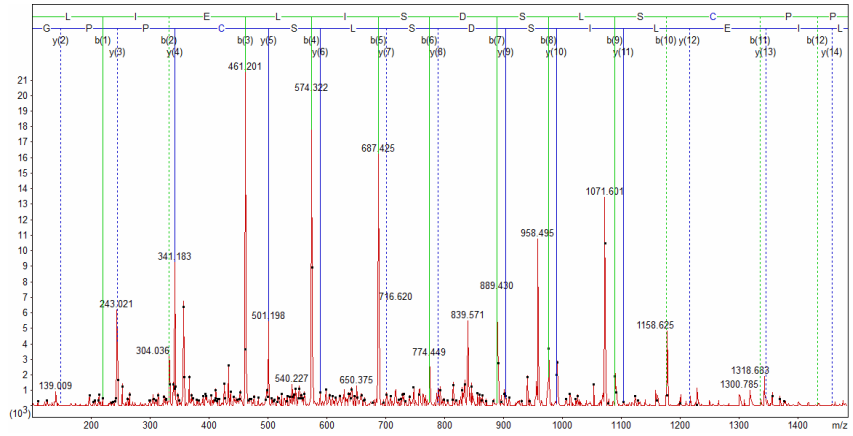

REPLICATE 3

VAS14\_10609 (score 143)

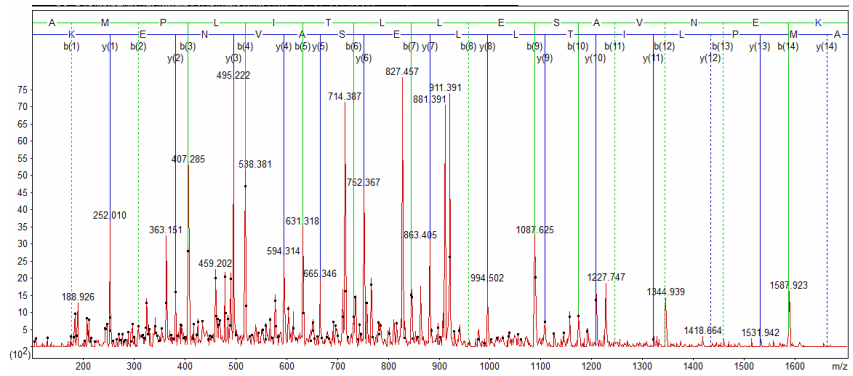

VAS14\_07324 (score 122)

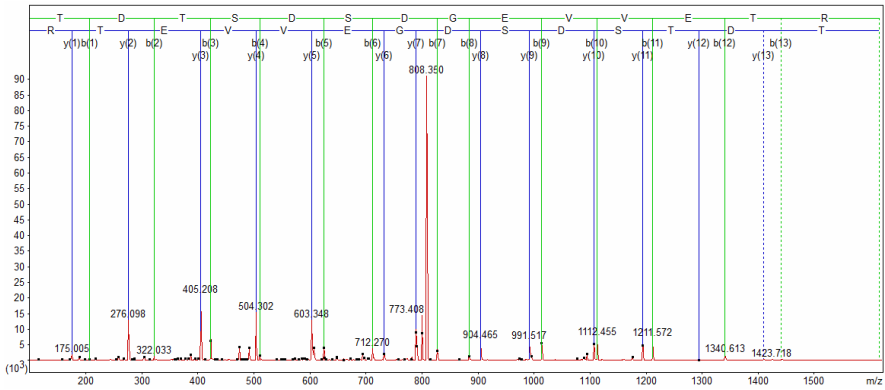

VAS14\_03748 (score 121)

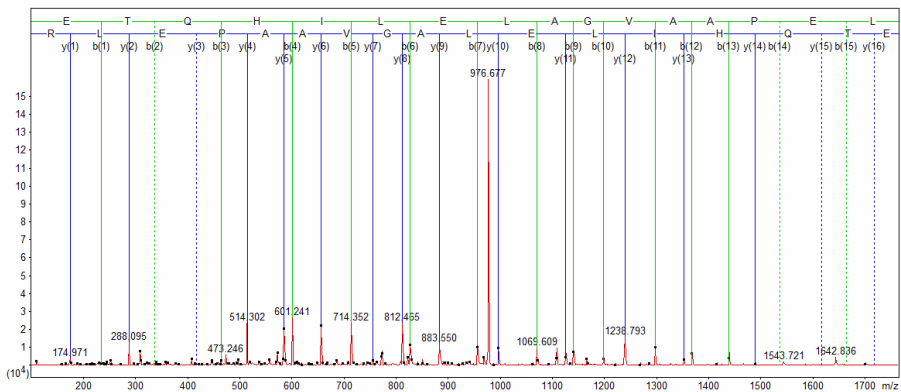

VAS14\_22452 (score 112)

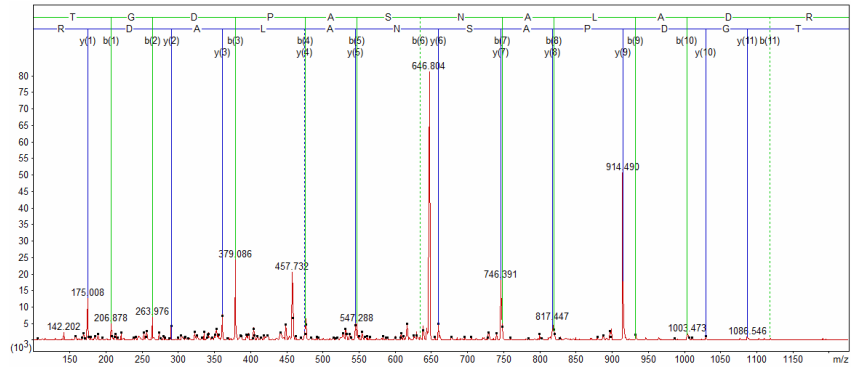

VAS14\_19511 (score 101)

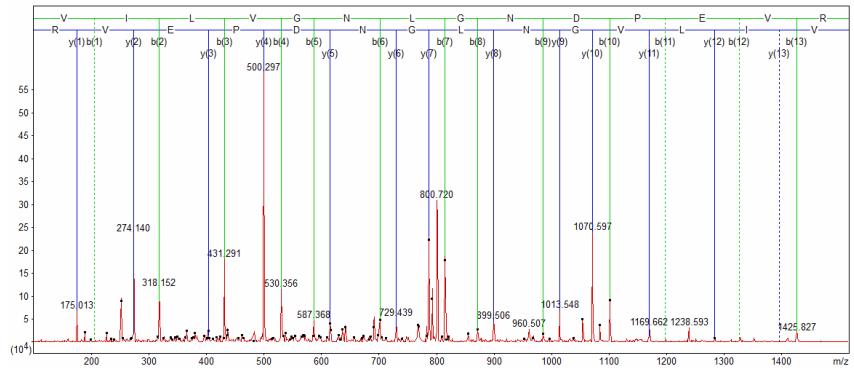

VAS14\_21467 (score 109)

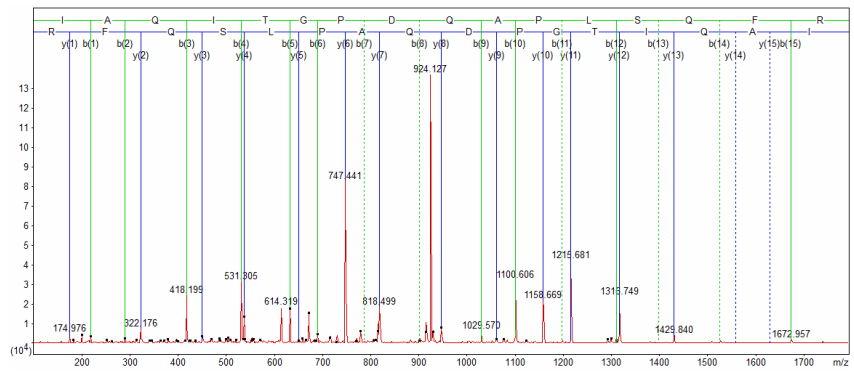

VAS14\_00951 (score 104)

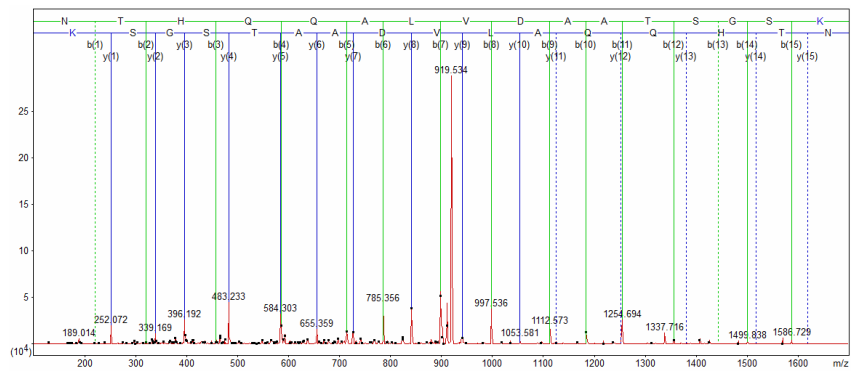

VAS14\_07169 (score 99)

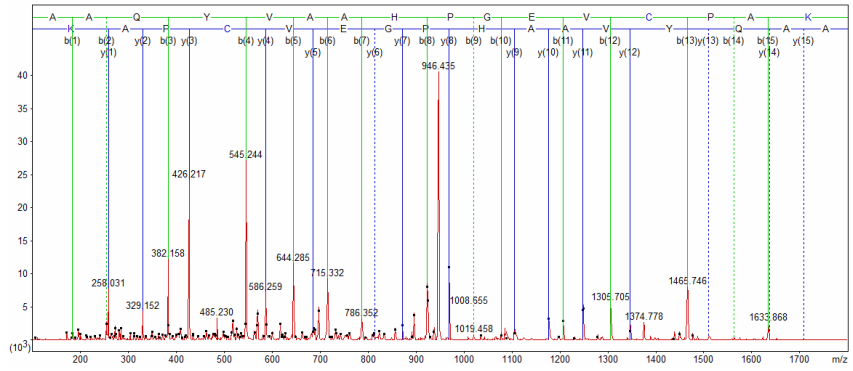

VAS14\_09464 (score 95)

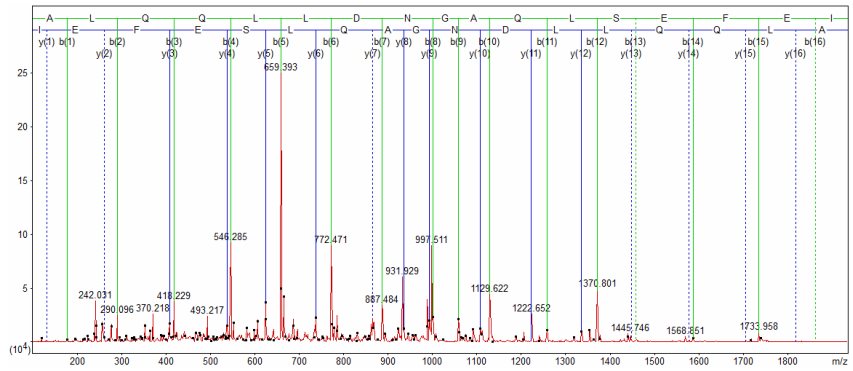

VAS14\_00448 (score 93)

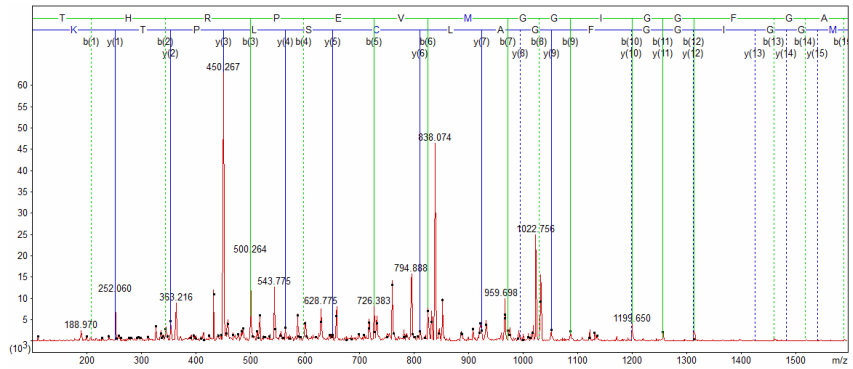

VAS14\_19086 (score 93)

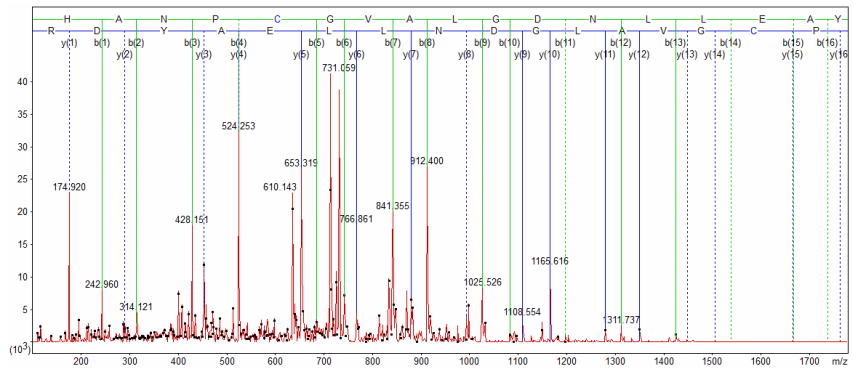



**VAS14\_12979 (score 87)**

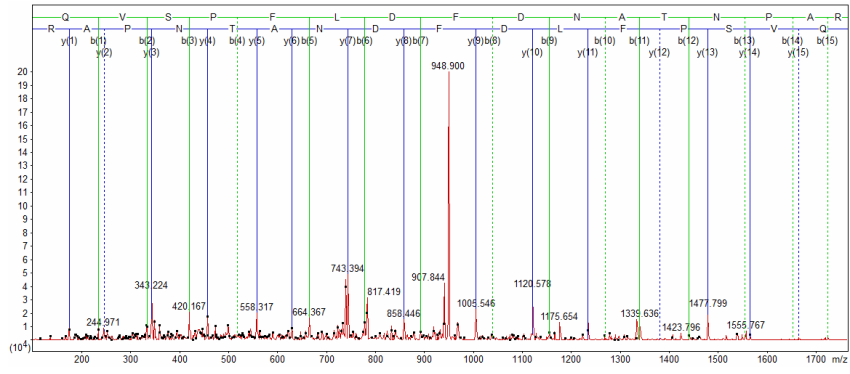

**VAS14\_18931 (score 79)**

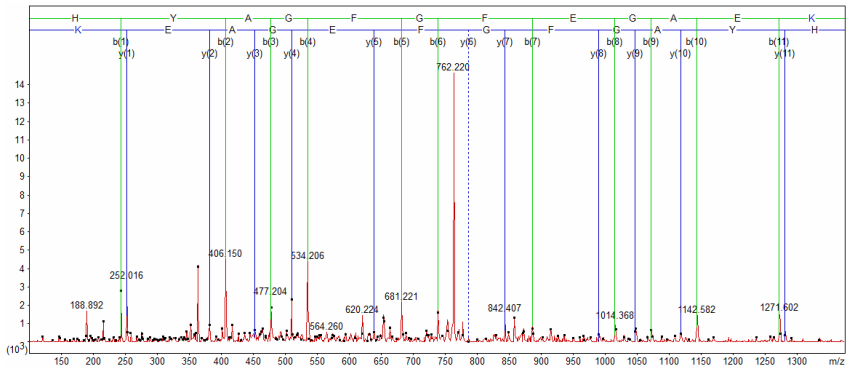

**VAS14\_18834 (score 78)**

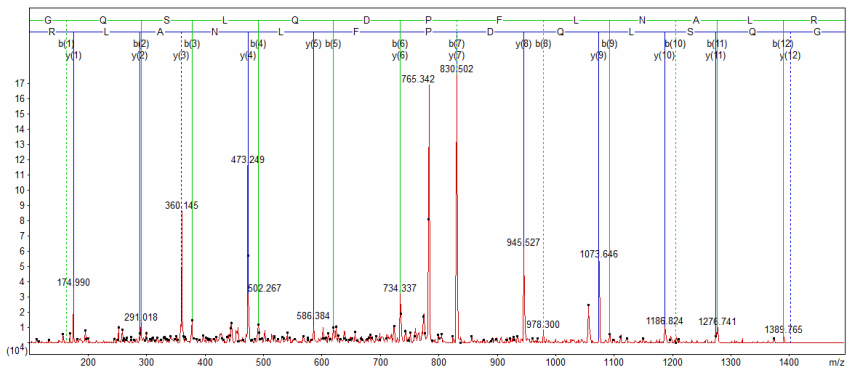

**VAS14\_19301 (score 73)**

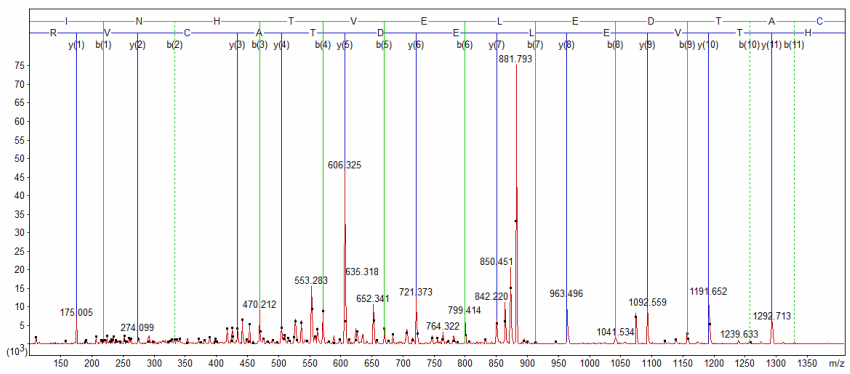

**VAS14\_19141 (score 70)**

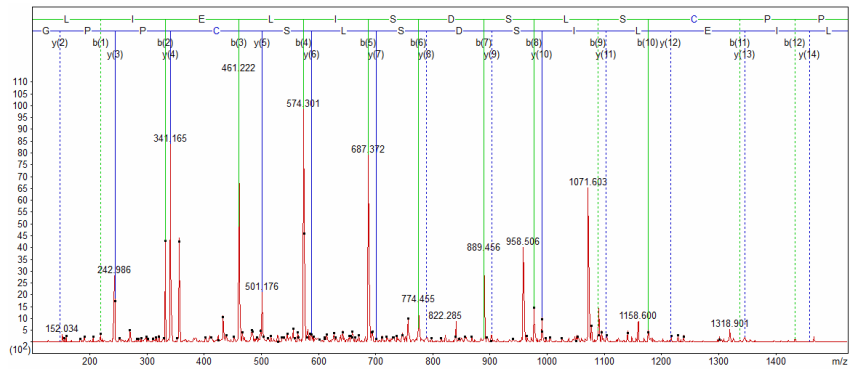

**VAS14\_02266 (score 69)**

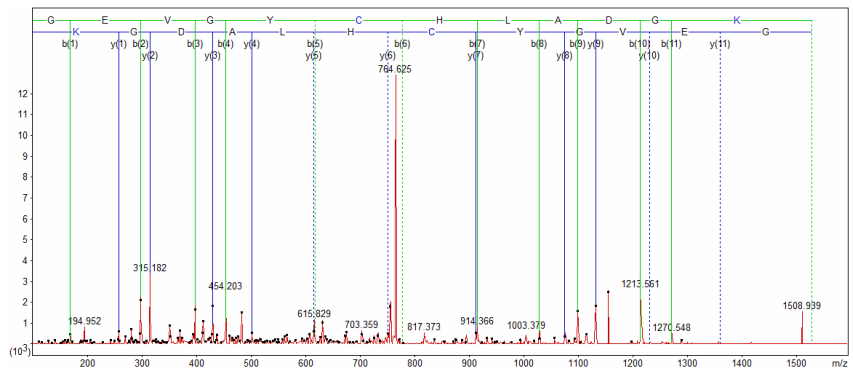

**VAS14\_11504 (score 69)**

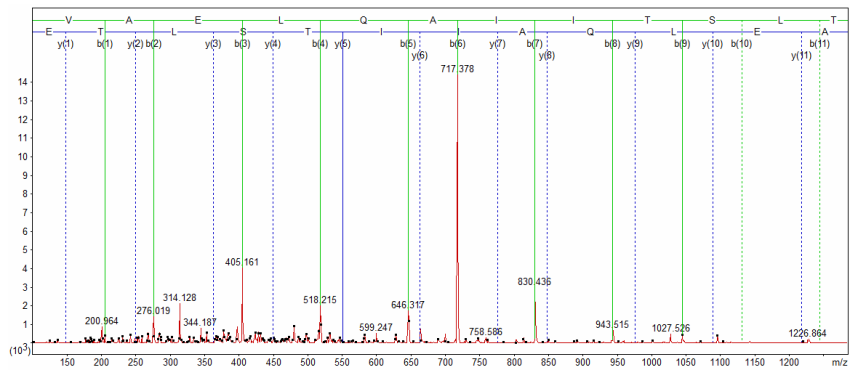

**VAS14\_05238 (score 66)**

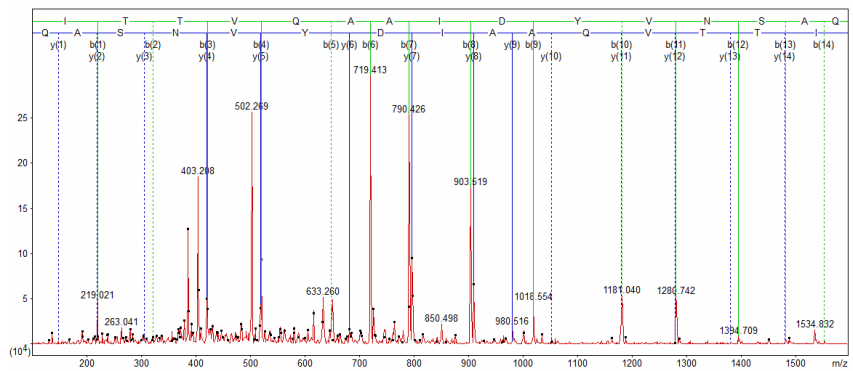

VAS14\_18194 (score 66)

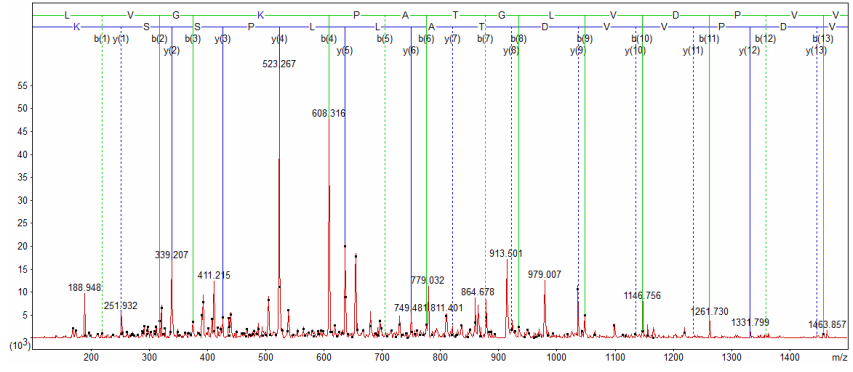

VAS14\_10544 (score 66)

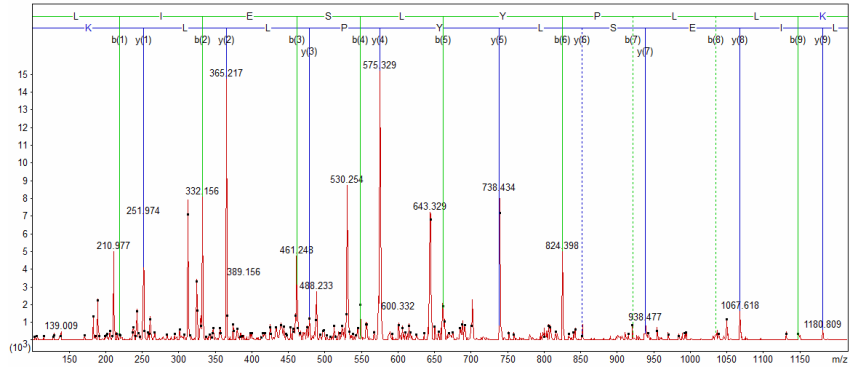

VAS14\_11494 (score 65)

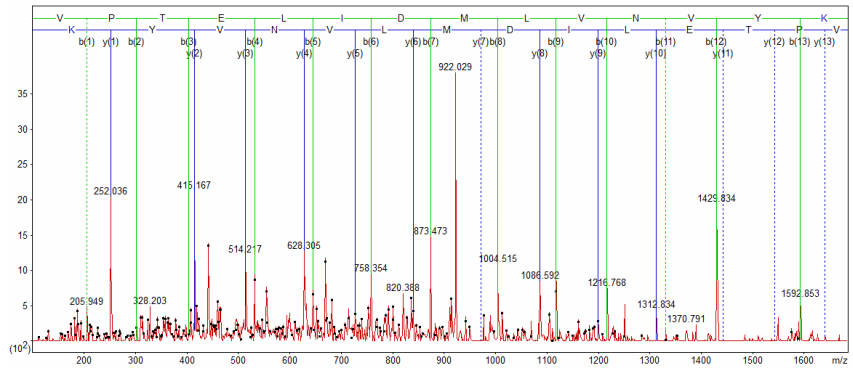

VAS14\_17636 (score 64)

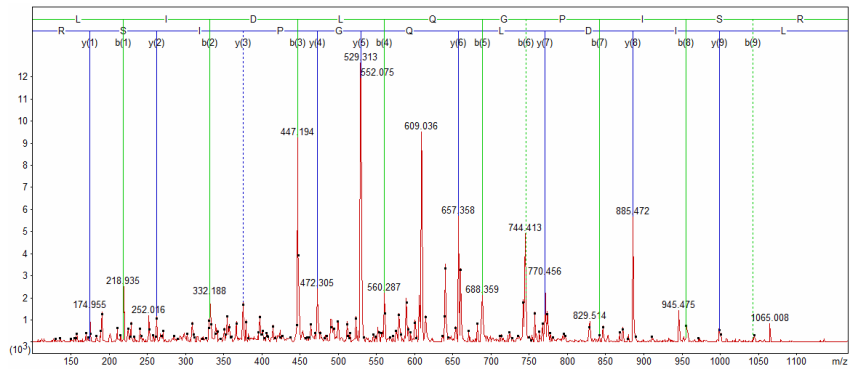

**VAS14\_16601 (score 64)**

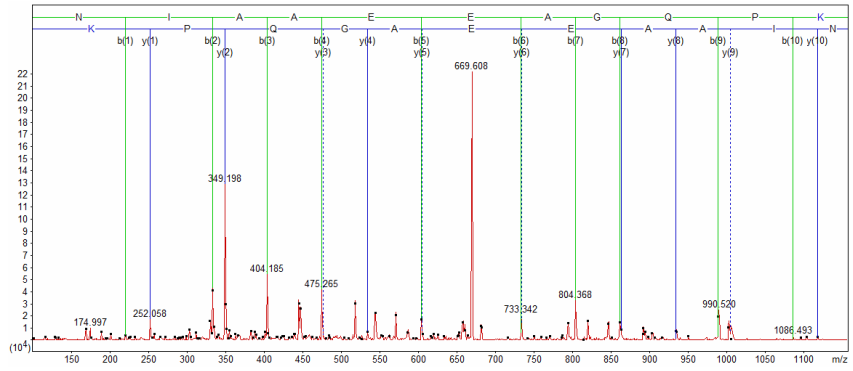

**VAS14\_21772 (score 63)**

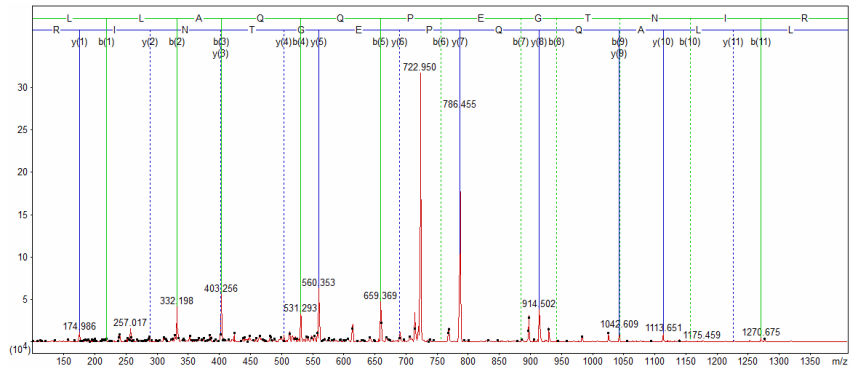

**VAS14\_20171(score 62)**

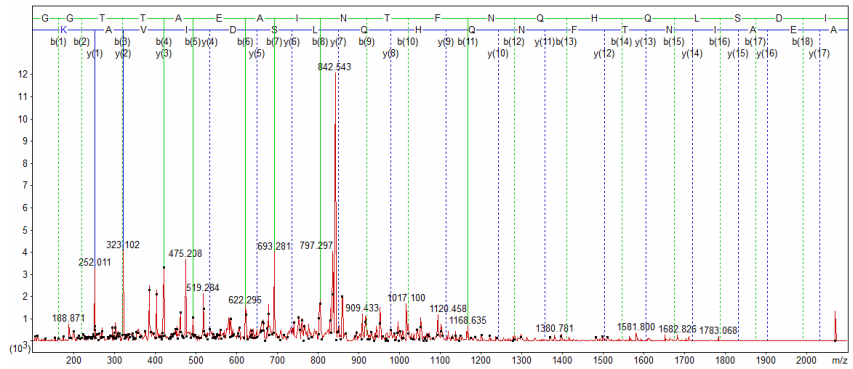

**VAS14\_05413 (score 60)**

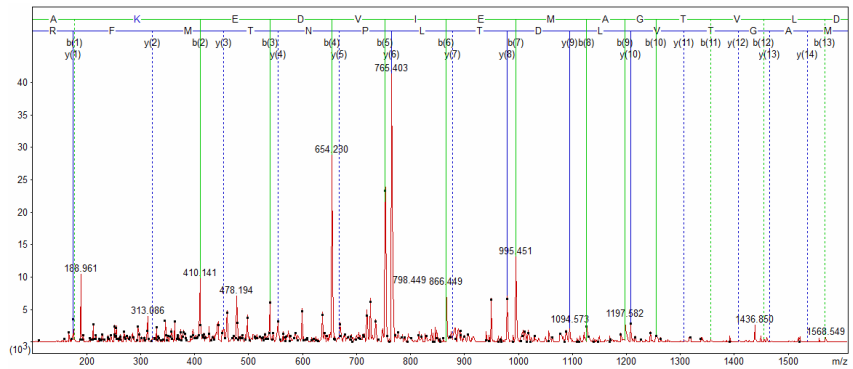

**VAS14\_06918 (score 59)**

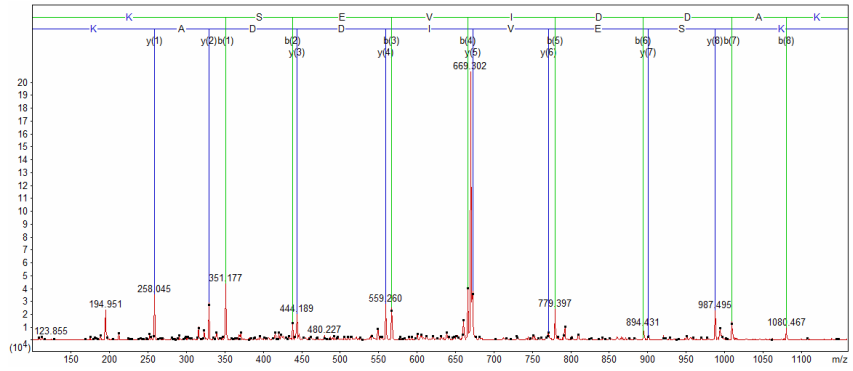

**VAS14\_19666 (score 57)**

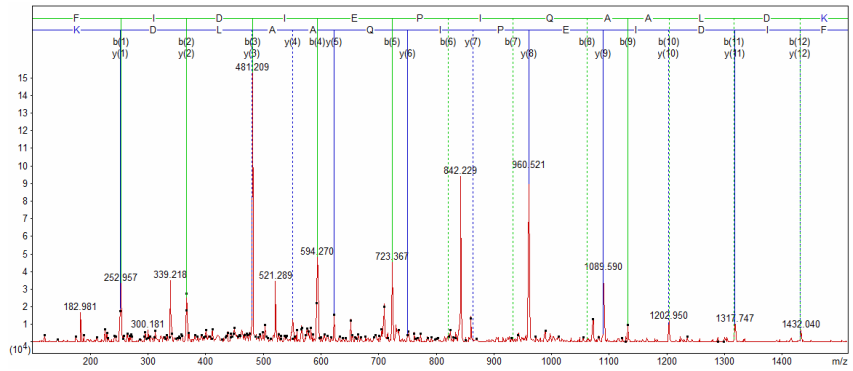

**VAS14\_02738 (score 55)**

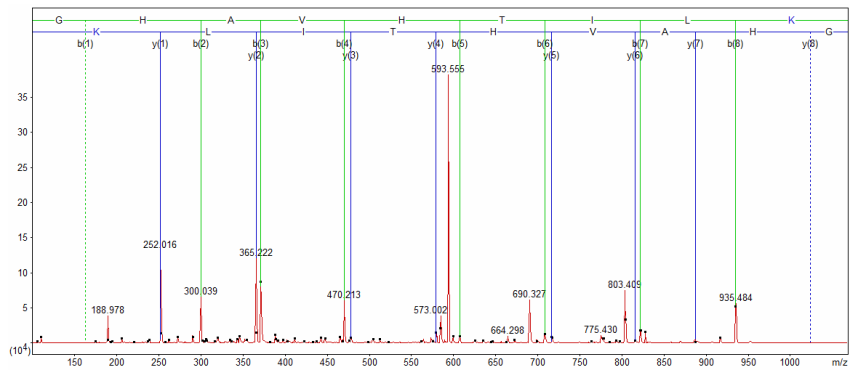

**VAS14\_00641(score 53)**

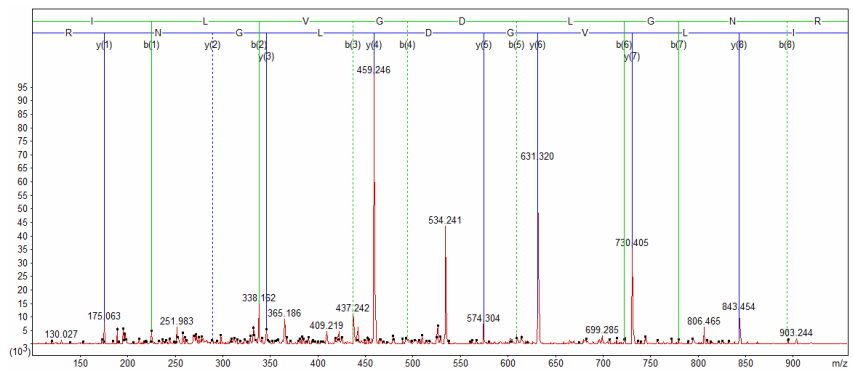

**VAS14\_19896 (score 49)**

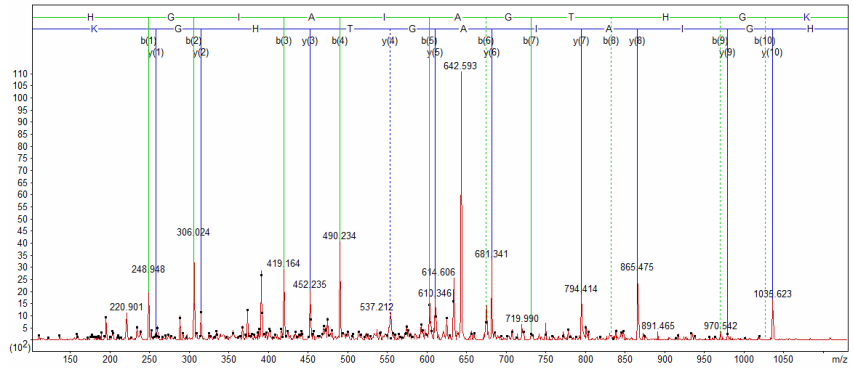

**VAS14\_03053 (score 47)**

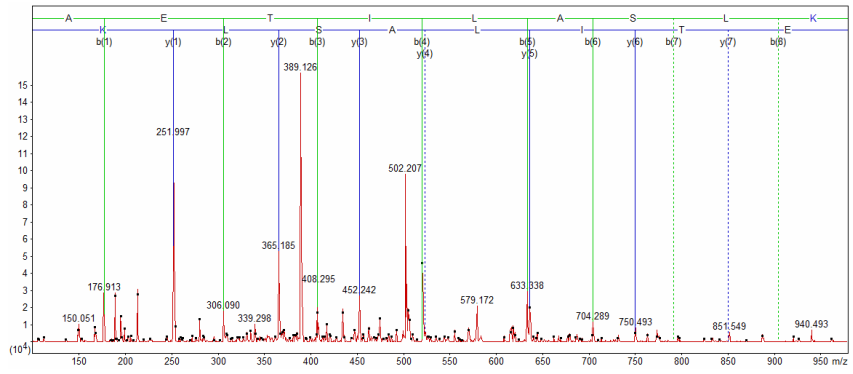

**VAS14\_07789 (score 46)**

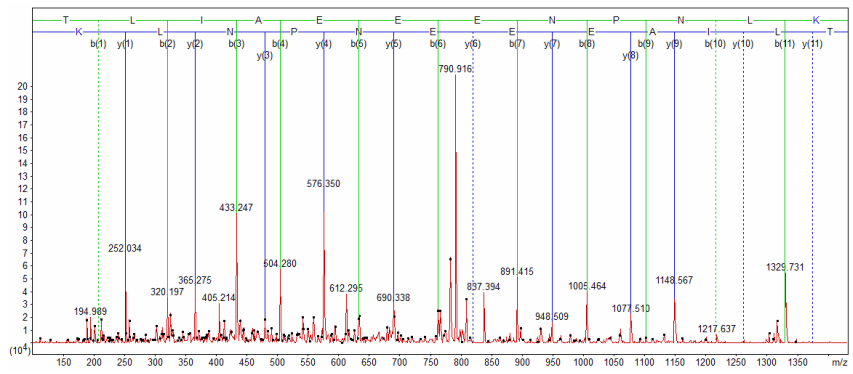

**VAS14\_05903 (score 41)**

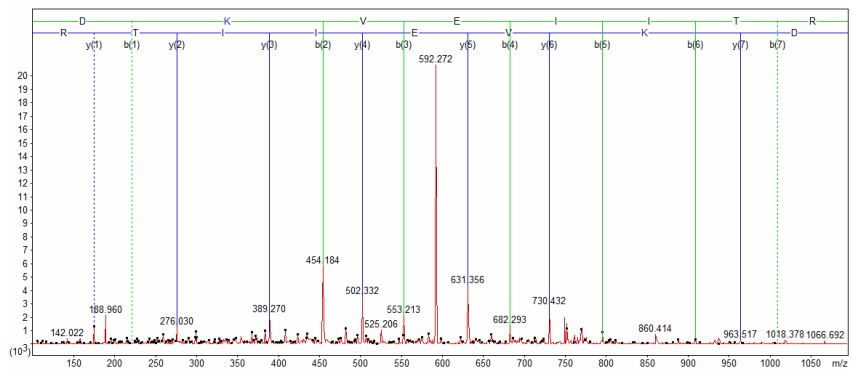

**VAS14\_07945 (score 40)**

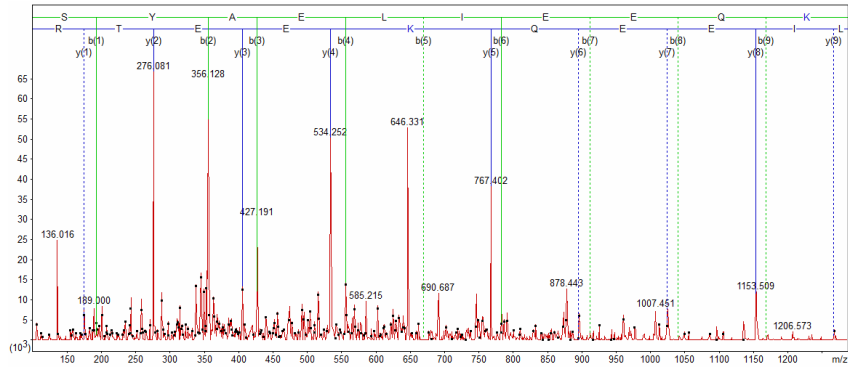

**REPLICATE 4**

**VAS14\_07719 (score 82)**

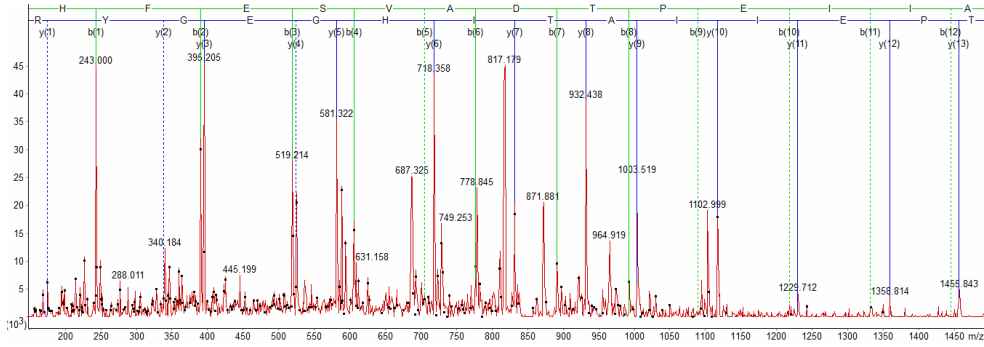

**VAS14\_04213 (score 78)**

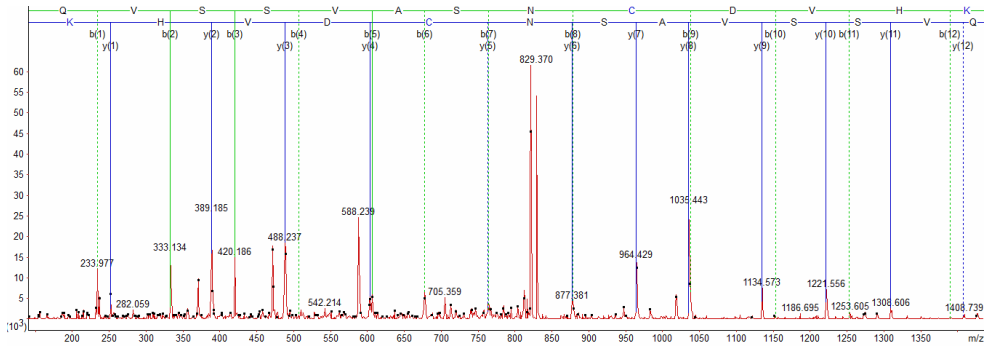

**VAS14\_21507 (score 73)**

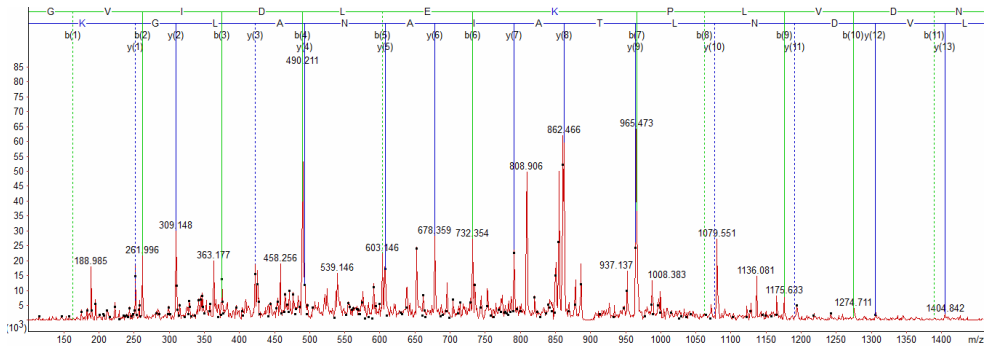

VAS14\_06353 (score 68)

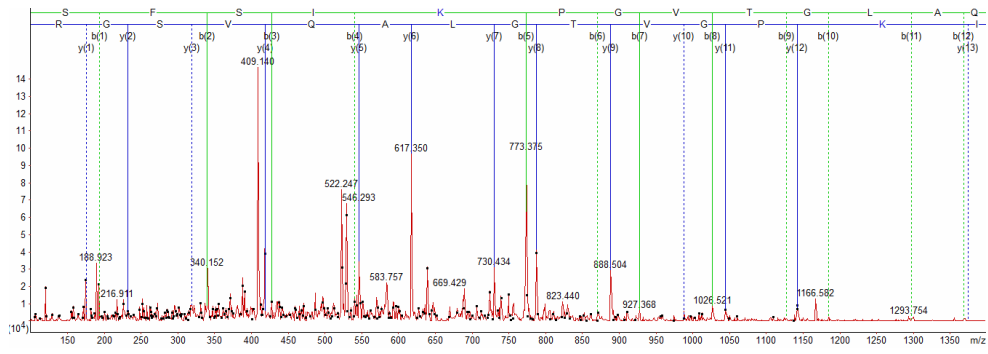

VAS14\_21772 (score 67)

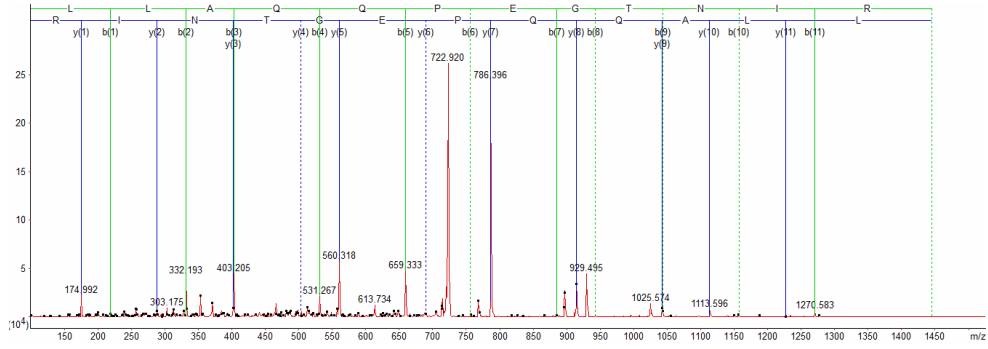

VAS14\_21322 (score 65)

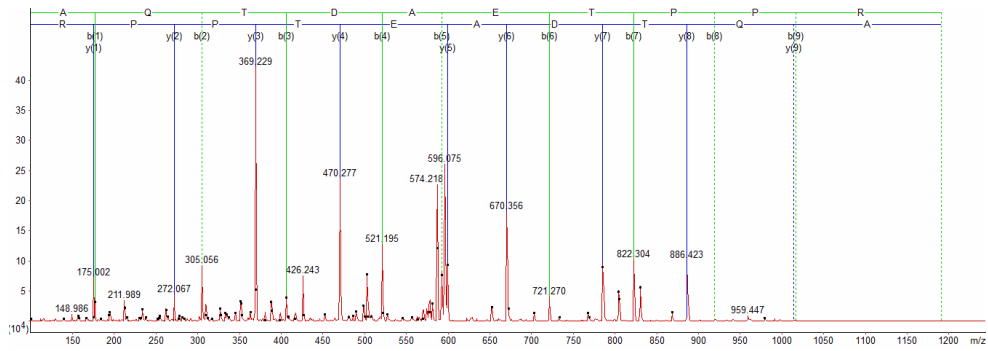

VAS14\_04148 (score 65)

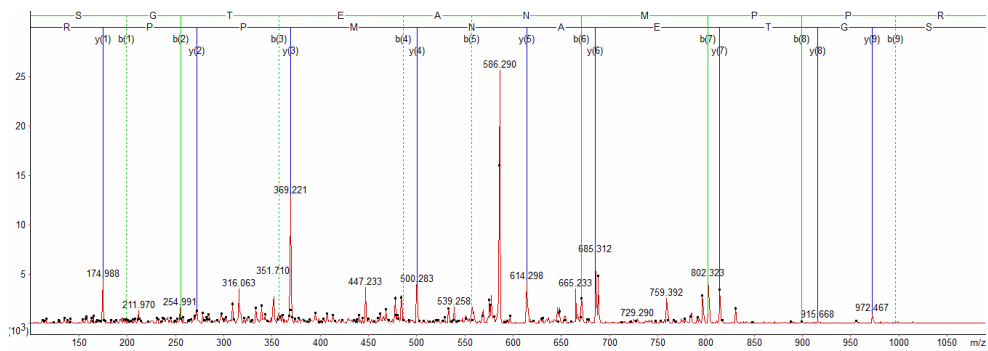



VAS14\_17316 (score 65)

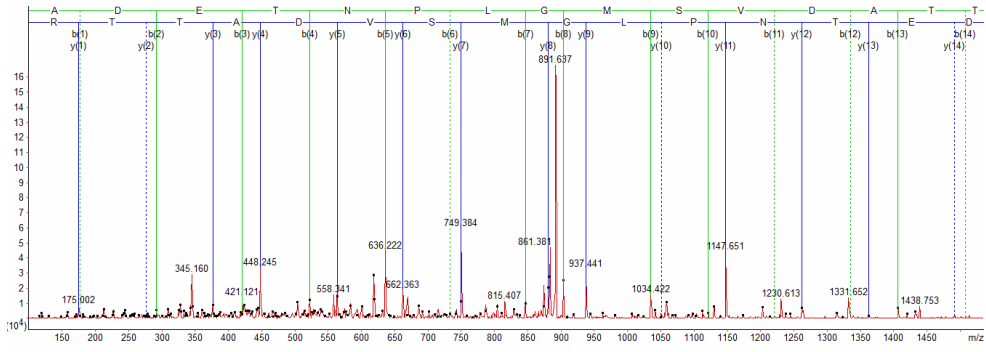

VAS14\_08335 (score 61)

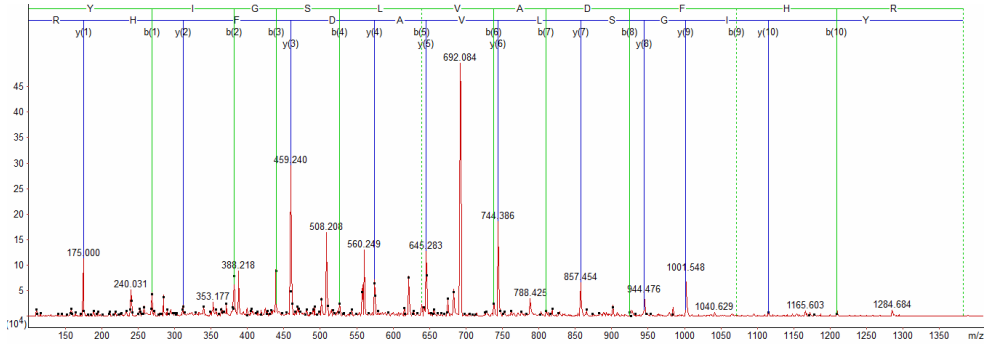

VAS14\_18961 (score 60)

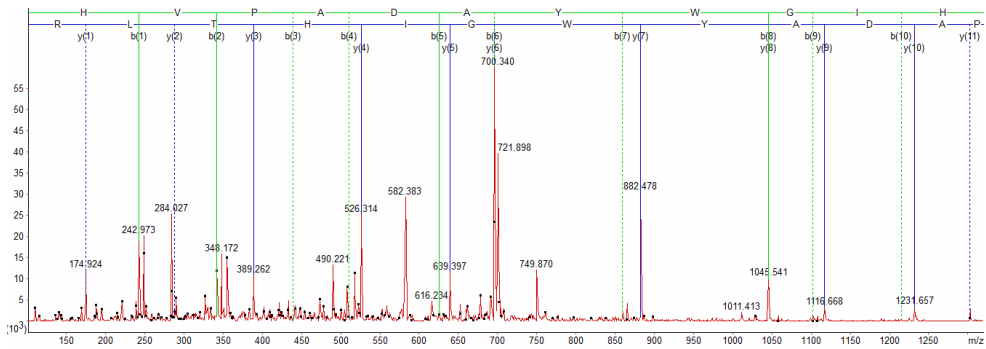

VAS14\_05643 (score 57)

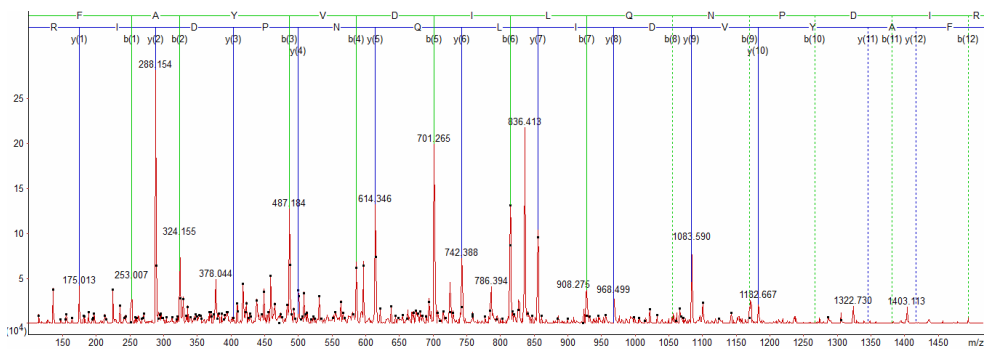

VAS14\_21362 (score 57)

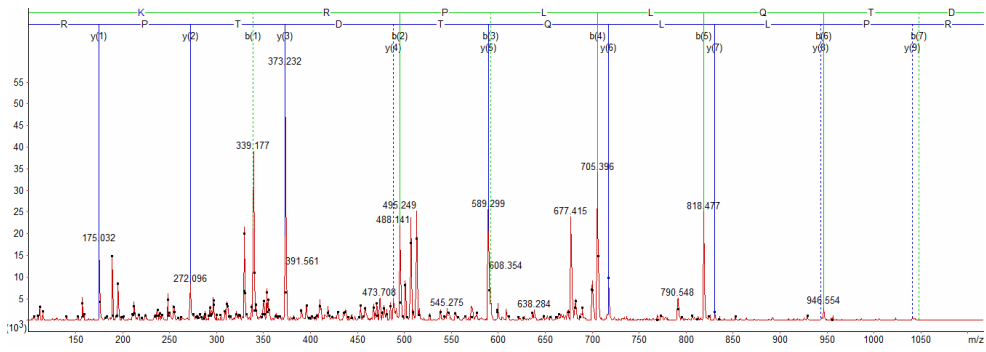

VAS14\_22162 (score 56)

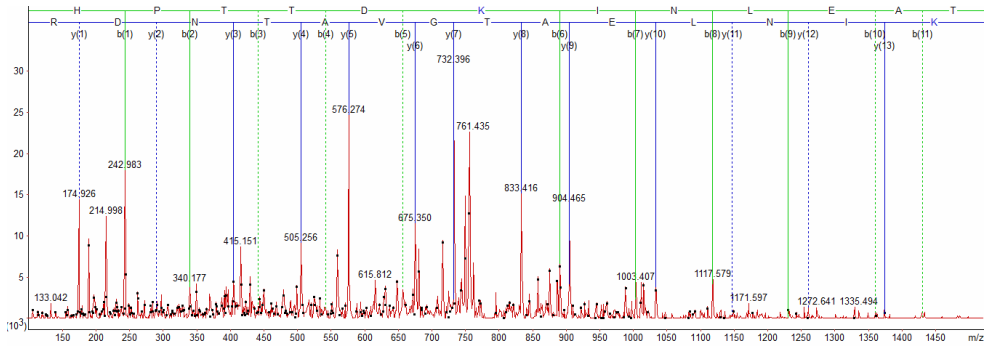

VAS14\_04613 (score 56)

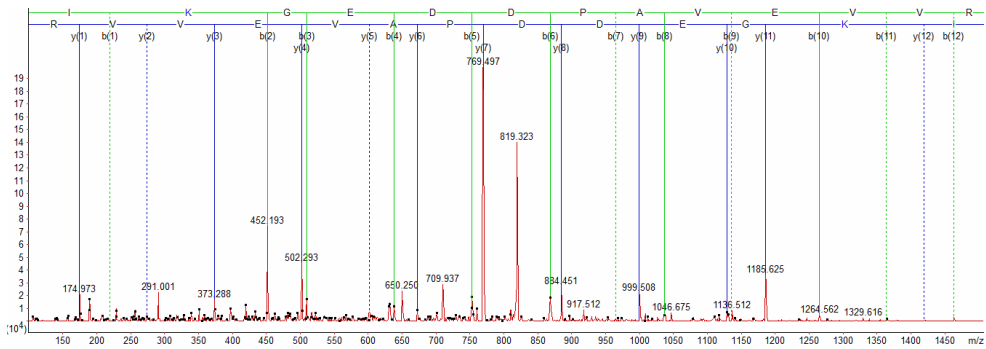

VAS14\_17871 (score 55)

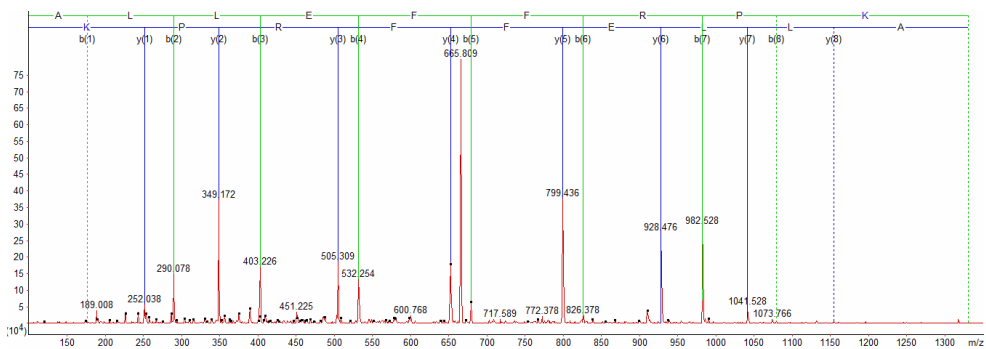

VAS14\_02878 (score 54)

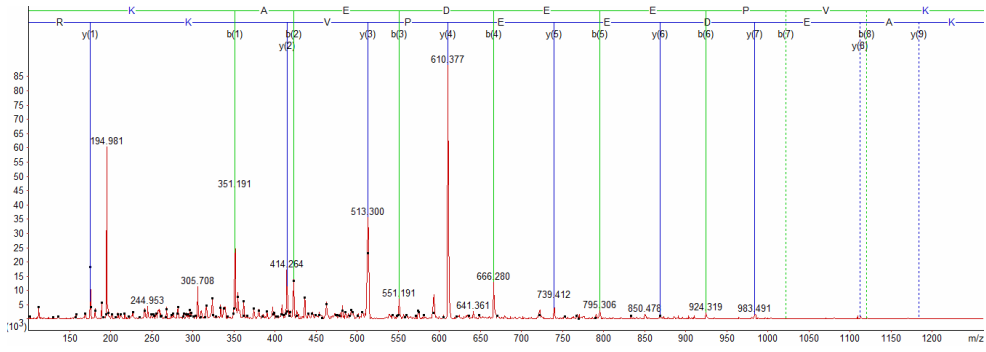

VAS14\_06693 (score 53)

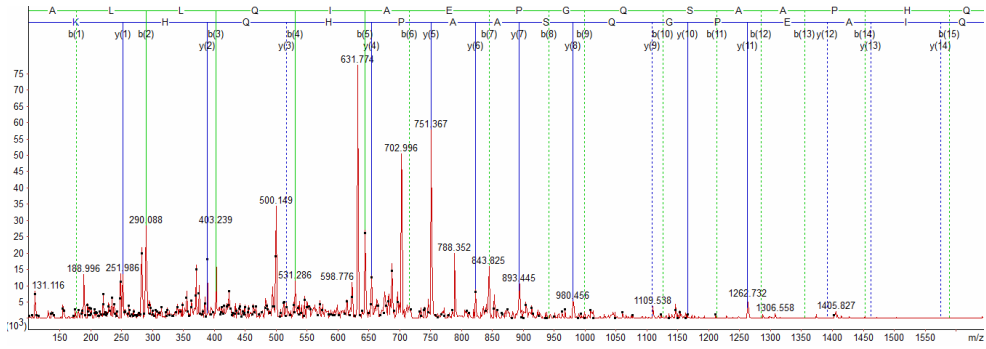

VAS14\_22794 (score 54)

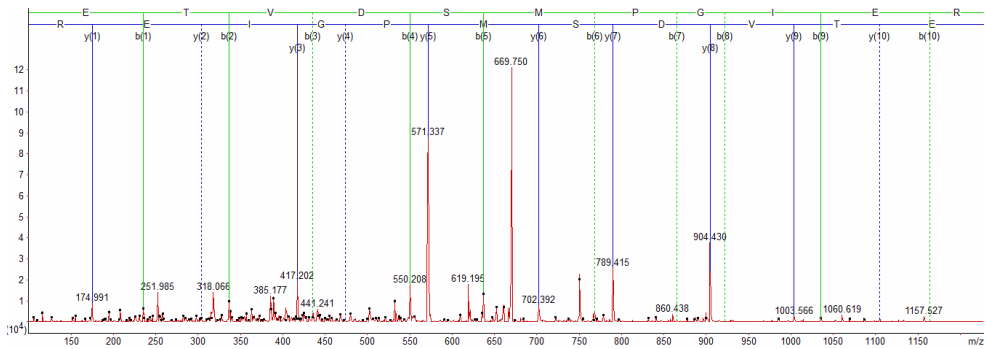

VAS14\_09399 (score 50)

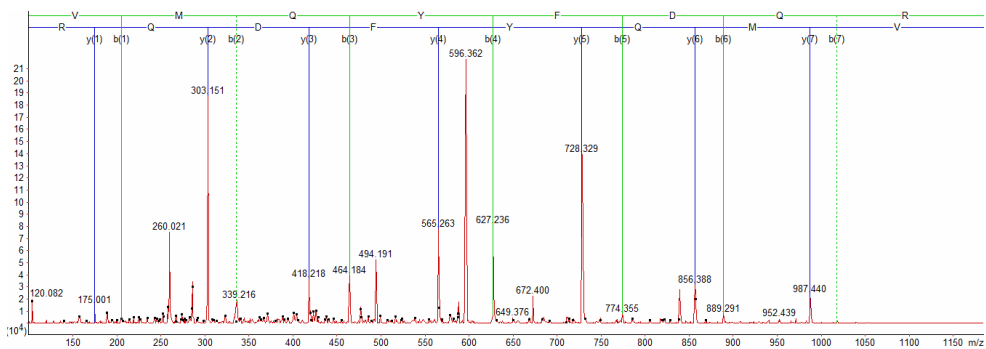

VAS14\_22854 (score 46)

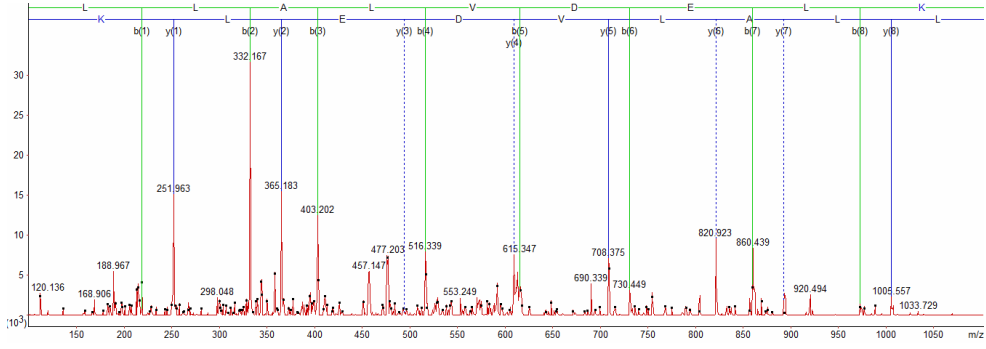

VAS14\_07369 (score 46)

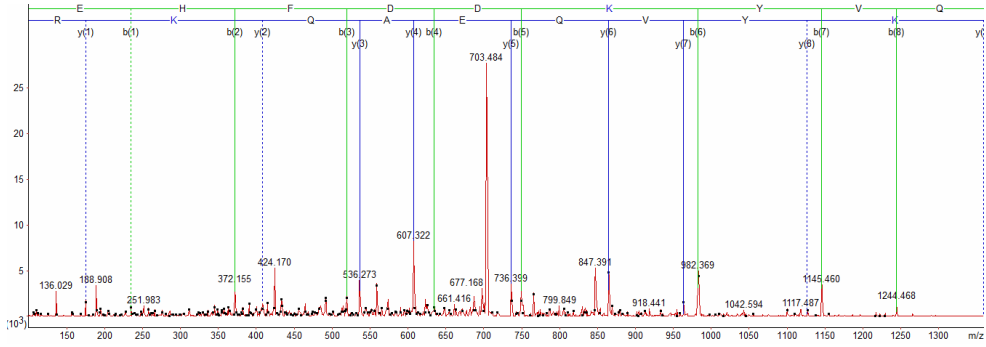

VAS14\_18624 (score 46)

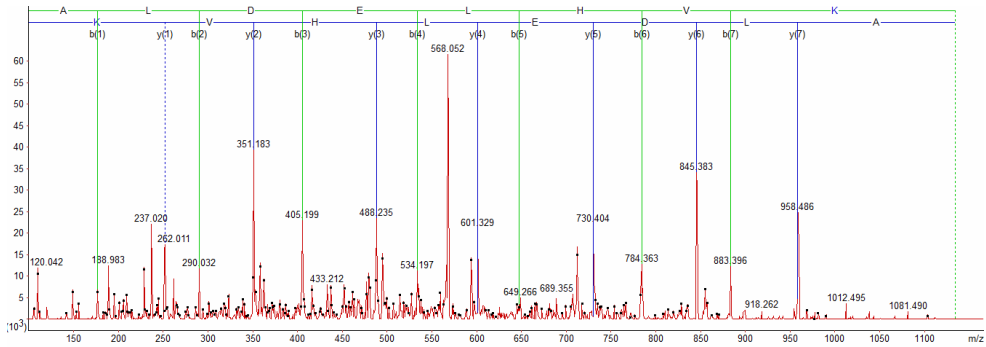

VAS14\_03053 (score 46)

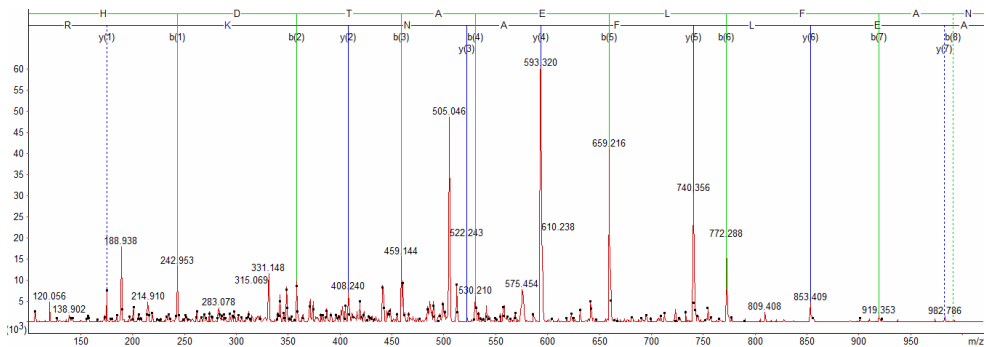

**VAS14\_15679 (score 45)**

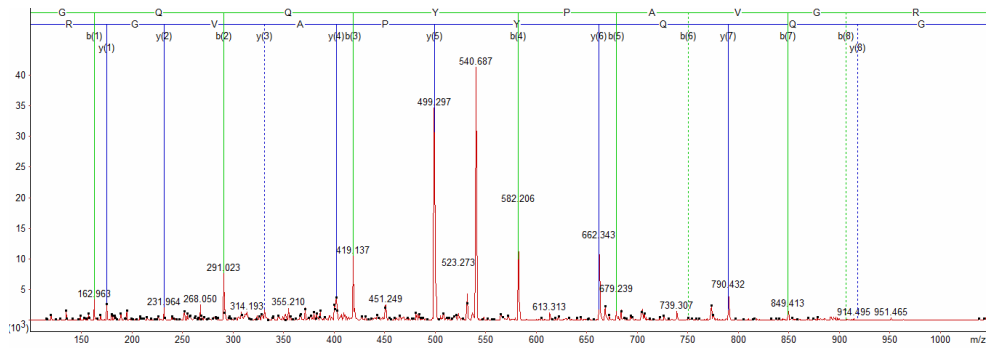

**VAS14\_02316 (score 43)**

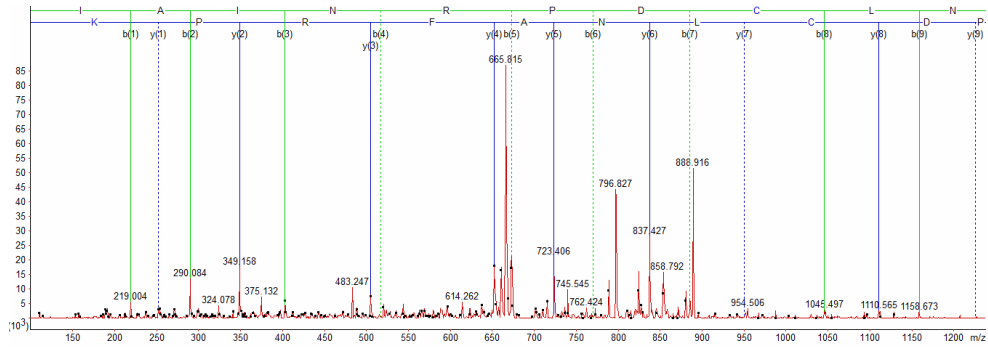

Supplement: pone.0042299.s001.pdf [file pone.0042299.s001.pdf]
